# Supplementary material
Source: HighWire-hosted journal article supplement (https://dmd.aspetjournals.org/highwire/filestream/70984/field_highwire_adjunct_files/0/Supplemental_78691.pdf)
Supplement: Supplemental_78691.pdf [file Supplemental_78691.pdf]

## **Title**

### **Risk of Clinically Relevant Pharmacokinetic-based Drug-drug Interactions with Drugs Approved by the U.S. Food and Drug Administration Between 2013 and 2016**

Jingjing Yu, Zhu Zhou, Jessica Tay-Sontheimer, René H. Levy, and Isabelle Ragueneau-Majlessi

Department of Pharmaceutics, School of Pharmacy, University of Washington, Seattle, WA, USA (J.Y., J.T-S., R.H.L., I.R-M.); Department of Pharmaceutics and Medicinal Chemistry, Thomas J. Long School of Pharmacy and Health Sciences, University of the Pacific, Stockton, CA 95211 (Z.Z.)

## **Drug Metabolism and Disposition**

### **Supplemental Data**

Contents:

- Supplemental Table 1
- Supplemental Table 2
- Supplemental Table 3
- Supplemental Table 4
- Supplemental Table 5
- Supplemental Table 6
- Supplemental Figures 1 A&B&C&D&E&F
- Supplemental Figures 2 A&B&C&D&E&F
- Supplemental Figures 3 A&B&C&D

Supplemental Table 1. NDAs approved by the U.S. FDA from 2013 to 2016

| Drug Name                                     | Therapeutic Class                                  | Brand Name | NDA #  | Approval Date |
|-----------------------------------------------|----------------------------------------------------|------------|--------|---------------|
| 2013 (N = 25)                                 |                                                    |            |        |               |
| Afatinib                                      | Cancer treatments                                  | GILOTRIF   | 201192 | 07/12         |
| Alogliptin                                    | Metabolism<br>disorder/endocrinology<br>treatments | NESINA     | 022271 | 01/25         |
| Canagliflozin                                 | Metabolism<br>disorder/endocrinology<br>treatments | INVOKANA   | 204042 | 03/29         |
| (Conjugated<br>estrogens and)<br>bazedoxifene | Metabolism<br>disorder/endocrinology<br>treatments | DUAVEE     | 022247 | 10/03         |
| Dabrafenib                                    | Cancer treatments                                  | TAFINLAR   | 202806 | 05/29         |
| Dimethyl<br>fumarate                          | Central nervous system<br>agents                   | TECFIDERA  | 204063 | 03/27         |
| Dolutegravir                                  | Antivirals                                         | TIVICAY    | 204790 | 08/12         |
| Eslicarbazepine<br>acetate                    | Central nervous system<br>agents                   | APTIOM     | 022416 | 11/08         |
| Flutemetamol F-                               | Diagnostic agents                                  | VIZAMYL    | 203137 | 10/25         |

---

|                                   |                                                    |              |        |       |
|-----------------------------------|----------------------------------------------------|--------------|--------|-------|
| (Fluticasone and)<br>vilanterol   | Respiratory system<br>agents                       | BREO ELLIPTA | 204275 | 05/10 |
| Gadoterate<br>meglumine           | Diagnostic agents                                  | DOTAREM      | 204781 | 03/20 |
| Ibrutinib                         | Cancer treatments                                  | IMBRUVICA    | 205552 | 11/13 |
| Luliconazole                      | Antifungals                                        | LUZU         | 204153 | 11/14 |
| Macitentan                        | Cardiovascular drugs                               | OPSUMIT      | 204410 | 10/18 |
| Mipomersen                        | Metabolism<br>disorder/endocrinology<br>treatments | KYNAMRO      | 203568 | 01/29 |
| Ospemifene                        | Metabolism<br>disorder/endocrinology<br>treatments | OSPHENA      | 203505 | 02/26 |
| Pomalidomide                      | Cancer treatments                                  | POMALYST     | 204026 | 02/08 |
| Radium Ra 223<br>dichloride       | Cancer treatments                                  | XOFIGO       | 203971 | 05/15 |
| Riociguat                         | Cardiovascular drugs                               | ADEMPAS      | 204819 | 10/08 |
| Simeprevir                        | Antivirals                                         | OLYSIO       | 205123 | 11/22 |
| Sofosbuvir                        | Antivirals                                         | SOVALDI      | 204671 | 12/06 |
| Technetium Tc-<br>99M tilmanocept | Diagnostic agents                                  | LYMPHOSEEK   | 202207 | 03/13 |

---

---

|                                  |                                                    |                  |        |       |
|----------------------------------|----------------------------------------------------|------------------|--------|-------|
| Trametinib                       | Cancer treatments                                  | MEKINIST         | 204114 | 05/29 |
| Umeclidinium<br>(and vilanterol) | Respiratory system<br>agents                       | ANORO<br>ELLIPTA | 203975 | 12/08 |
| Vortioxetine                     | Central nervous system<br>agents                   | BRINTELLIX       | 204447 | 09/30 |
| 2014 (N = 30)                    |                                                    |                  |        |       |
| Apremilast                       | Musculoskeletal Agent                              | OTEZLA           | 205437 | 03/21 |
| Belinostat                       | Cancer treatments                                  | BELEODAQ         | 206256 | 07/03 |
| Ceftolozane and<br>Tazobactam    | Antibiotics                                        | ZERBAXA          | 206829 | 12/19 |
| Ceritinib                        | Cancer treatments                                  | ZYKADIA          | 205755 | 04/29 |
| Dalbavancin                      | Antibiotics                                        | DALVANCE         | 021883 | 05/23 |
| Dapagliflozin                    | Metabolism<br>disorder/endocrinology<br>treatments | FARXIGA          | 202293 | 01/08 |
| Droxidopa                        | Cardiovascular drugs                               | NORTHERA         | 203202 | 02/18 |
| Efinaconazole                    | Antifungals                                        | JUBLIA           | 203567 | 06/06 |
| Eliglustat                       | Metabolism<br>disorder/endocrinology<br>treatments | CERDELGA         | 205494 | 08/19 |
| Empagliflozin                    | Metabolism                                         | JARDIANCE        | 204629 | 08/01 |

---

---

| disorder/endocrinology                                                            |                              |                       |        |       |
|-----------------------------------------------------------------------------------|------------------------------|-----------------------|--------|-------|
| treatments                                                                        |                              |                       |        |       |
| Finafloxacin                                                                      | Antibiotics                  | XTORO                 | 206307 | 12/17 |
| Florbetaben                                                                       | Diagnostic agents            | NEURACEQ              | 204677 | 03/19 |
| Idelalisib                                                                        | Cancer treatments            | ZYDELIG               | 206545 | 07/23 |
| Ledipasvir (and<br>sofosbuvir)                                                    | Antivirals                   | HARVONI               | 205834 | 10/10 |
| Miltefosine                                                                       | Antiparasitics               | IMPAVIDO              | 204684 | 03/19 |
| Naloxegol                                                                         | Gastrointestinal agents      | MOVANTIK              | 204760 | 09/06 |
| Netupitant (and<br>Palonosetron)                                                  | Gastrointestinal agents      | AKYNZEO               | 205718 | 10/10 |
| Nintedanib                                                                        | Respiratory system<br>agents | OFEV                  | 205832 | 10/15 |
| Olaparib                                                                          | Cancer treatments            | LYNPARZA              | 206162 | 12/19 |
| Olodaterol                                                                        | Respiratory system<br>agents | STRIVERDI<br>RESPIMAT | 203108 | 07/31 |
| Ombitasvir,<br>Paritaprevir, and<br>(Ritonavir) co-<br>packaged with<br>Dasabuvir | Antivirals                   | VIEKIRA PAK           | 206619 | 12/19 |

---

---

|                                                        |                                  |           |        |       |
|--------------------------------------------------------|----------------------------------|-----------|--------|-------|
| Oritavancin                                            | Antibiotics                      | ORBACTIV  | 206334 | 08/06 |
| Peramivir                                              | Antivirals                       | RAPIVAB   | 206426 | 12/19 |
| Pirfenidone                                            | Respiratory system<br>agents     | ESBRIET   | 022535 | 10/15 |
| Sulfur<br>hexafluoride<br>lipid-type A<br>microspheres | Diagnostic agents                | LUMASON   | 203684 | 10/10 |
| Suvorexant                                             | Central nervous system<br>agents | BELSOMRA  | 204569 | 08/13 |
| Tasimelteon                                            | Central nervous system<br>agents | HETLIOZ   | 205677 | 01/31 |
| Tavaborole                                             | Antifungals                      | KERYDIN   | 204427 | 07/07 |
| Tedizolid<br>phosphate                                 | Antibiotics                      | SIVEXTRO  | 205435 | 06/20 |
| Vorapaxar                                              | Cardiovascular drugs             | ZONTIVITY | 204886 | 05/08 |
| 2015 (N = 33)                                          |                                  |           |        |       |
| Alectinib                                              | Cancer treatments                | ALECENSA  | 208434 | 12/11 |
| Aripiprazole<br>lauroxil                               | Central nervous system<br>agents | ARISTADA  | 207533 | 10/05 |
| Brexipiprazole                                         | Central nervous system           | REXULTI   | 205422 | 7/10  |

---

---

|                                                                                                      |                                                    |          |        |       |
|------------------------------------------------------------------------------------------------------|----------------------------------------------------|----------|--------|-------|
|                                                                                                      | agents                                             |          |        |       |
| Cangrelor                                                                                            | Cardiovascular drugs                               | KENGREAL | 204958 | 06/22 |
| Cariprazine                                                                                          | Central nervous system                             | VRAYLAR  | 204370 | 09/17 |
|                                                                                                      | agents                                             |          |        |       |
| (Ceftazidime and)<br>avibactam                                                                       | Antibiotics                                        | AVYCAZ   | 206494 | 02/25 |
| Cholic acid                                                                                          | Metabolism<br>disorder/endocrinology<br>treatments | CHOLBAM  | 205750 | 03/17 |
| Cobimetinib                                                                                          | Cancer treatments                                  | COTELLIC | 206192 | 11/10 |
| Daclatasvir                                                                                          | Antivirals                                         | DAKLINZA | 206843 | 07/24 |
| Deoxycholic acid                                                                                     | Metabolism<br>disorder/endocrinology<br>treatments | KYBELLA  | 206333 | 04/29 |
| Edoxaban                                                                                             | Cardiovascular drugs                               | SAVAYSA  | 206316 | 01/08 |
| Eluxadoline                                                                                          | Gastrointestinal agents                            | VIBERZI  | 206940 | 05/27 |
| (Elvitegravir,<br>cobicistat,<br>emtricitabine,<br>and) tenofovir<br>alafenamide<br>fumarate sulfate | Antivirals                                         | GENVOYA  | 207561 | 11/05 |

---

---

|                            |                                |          |               |       |
|----------------------------|--------------------------------|----------|---------------|-------|
| Flibanserin                | Central nervous system agents  | ADDYI    | 022526        | 08/18 |
| Insulin degludec           | Metabolism disorder agent      | TRESIBA  | 203314        | 09/25 |
| Isavuconazonium sulfate    | Antifungals                    | CRESEMBA | 207500/207501 | 03/06 |
| Ivabradine                 | Cardiovascular drugs           | CORLANOR | 206143        | 04/15 |
| Ixazomib citrate           | Cancer treatments              | NINLARO  | 208462        | 11/20 |
| Lenvatinib                 | Cancer treatments              | LENVIMA  | 206947        | 02/13 |
| Lesinurad                  | Antigout and uricosuric agents | ZURAMPIC | 207988        | 12/22 |
| Lumacaftor (and ivacaftor) | Respiratory system agents      | ORKAMBI  | 206038        | 07/02 |
| Osimertinib                | Cancer treatments              | TAGRISSE | 208065        | 11/13 |
| Palbociclib                | Cancer treatments              | IBRANCE  | 207103        | 02/03 |
| Panobinostat               | Cancer treatments              | FARYDAK  | 205353        | 02/23 |
| Patiromer                  | Antidotes                      | VELTASSA | 205739        | 10/21 |
| Rolapitant                 | Antiemetics                    | VARUBI   | 206500        | 09/01 |
| Sacubitril (and valsartan) | Cardiovascular drugs           | ENTRESTO | 207620        | 07/07 |

---



---

|                                 |                                                    |            |        |       |
|---------------------------------|----------------------------------------------------|------------|--------|-------|
| Selexipag                       | Cardiovascular drugs                               | UPTRAVI    | 207947 | 12/21 |
| Sonidegib                       | Cancer treatments                                  | ODOMZO     | 205266 | 07/24 |
| Sugammadex                      | Antidotes                                          | BRIDION    | 022225 | 12/15 |
| Trabectedin                     | Cancer treatments                                  | YONDELIS   | 207953 | 10/23 |
| (Trifluridine and)<br>tipiracil | Cancer treatments                                  | LONSURF    | 207981 | 09/22 |
| Uridine triacetate              | Metabolism<br>disorder/endocrinology<br>treatments | XURIDEN    | 208169 | 09/04 |
| 2016 (N = 15)                   |                                                    |            |        |       |
| Brivaracetam                    | Central nervous system<br>agents                   | BRIVIACT   | 205836 | 02/18 |
| Crisaborole                     | Skin agents                                        | EUCRISA    | 207695 | 12/14 |
| Defibrotide<br>sodium           | Cardiovascular drugs                               | DEFITELIO  | 208114 | 03/30 |
| Elbasvir and<br>grazoprevir     | Antivirals                                         | ZEPATIER   | 208261 | 01/28 |
| Eteplirsen                      | Central nervous system<br>agents                   | EXONDYS 51 | 206488 | 09/19 |
| Fluciclovine F 18               | Diagnostic agents                                  | AXUMIN     | 208054 | 05/27 |
| Gallium Ga 68                   | Diagnostic agents                                  | NETSPOT    | 208547 | 06/01 |

---

---

dotatate

|                                 |                                                    |           |        |       |
|---------------------------------|----------------------------------------------------|-----------|--------|-------|
| Lifitegrast                     | Ophthalmic agents                                  | XIIDRA    | 208073 | 07/11 |
| Lixisenatide                    | Metabolism<br>disorder/endocrinology<br>treatments | ADLYXIN   | 208471 | 07/27 |
| Nusinersen                      | Central nervous system<br>agents                   | SPINRAZA  | 209531 | 12/23 |
| Obeticholic acid                | Metabolism<br>disorder/endocrinology<br>treatments | OCALIVA   | 207999 | 05/27 |
| Pimavanserin                    | Central nervous system<br>agents                   | NUPLAZID  | 207318 | 04/29 |
| Rucaparib                       | Cancer treatments                                  | RUBRACA   | 209115 | 12/19 |
| (Sofosbuvir and)<br>velpatasvir | Antivirals                                         | EPCLUSA   | 208341 | 06/28 |
| Venetoclax                      | Cancer treatments                                  | VENCLEXTA | 208573 | 04/11 |

---

Supplemental Table 2. Chemical structures of compounds within the NDAs approved in 2016 (ordered by approval date)

| NDA     | Compound<br>(CAS Registry<br>Number) | Structure <sup>b</sup>                                                                                                                                                                                                                                                                                                                                                                                                                                                                                                                                                                                                                                                                                                |
|---------|--------------------------------------|-----------------------------------------------------------------------------------------------------------------------------------------------------------------------------------------------------------------------------------------------------------------------------------------------------------------------------------------------------------------------------------------------------------------------------------------------------------------------------------------------------------------------------------------------------------------------------------------------------------------------------------------------------------------------------------------------------------------------|
| 208261  | Elbasvir<br>(1370468-36-2)           | 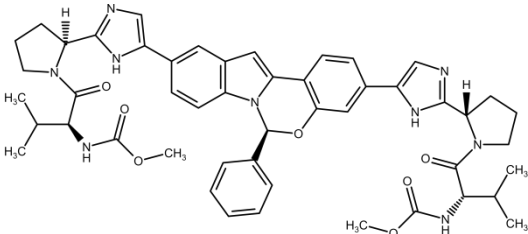                                                                                                                                                                                                                                                                                                                                                                                                                                                                                                                                                                                                                                    |
| (01/28) | Grazoprevir<br>(1350514-68-9)        |                                                                                                                                                                                                                                                                                                                                                                                                                                                                                                                                                                                                                                    |
| 205836  | Brivaracetam<br>(357336-20-0)        |                                                                                                                                                                                                                                                                                                                                                                                                                                                                                                                                                                                                                                   |
| 208114  | Defibrotide sodium<br>(83712-60-1)   |                                                                                                                                                                                                                                                                                                                                                                                                                                                                                                                                                                                                                                   |
|         |                                      | <p><i>n</i> = from about 2 to 50</p> <p>B =</p> <div style="display: flex; justify-content: space-around;"> <div data-bbox="805 1671 943 1772">  <p>Adenine</p> </div> <div data-bbox="967 1671 1105 1772">  <p>Guanine</p> </div> <div data-bbox="1130 1671 1268 1772">  <p>Cytosine</p> </div> <div data-bbox="1292 1671 1333 1772">  <p>Thymine</p> </div> </div> |

---

208573 Venetoclax  
(04/11) (1257044-40-8)

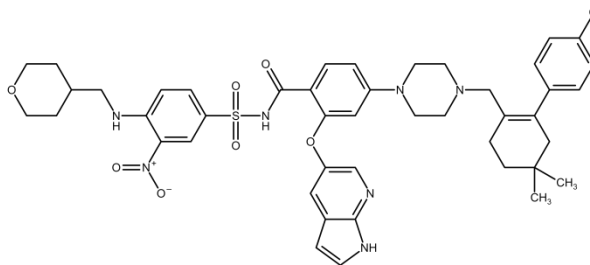

---

207318 Pimavanserin  
(04/29) (706779-91-1)

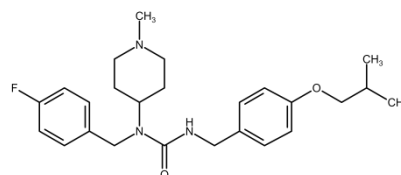

---

207999 Obeticholic acid  
(05/27) (459789-99-2)

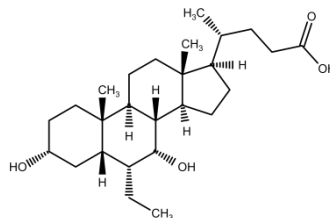

---

208054 Fluciclovine F-18  
(05/27) (222727-39-1)

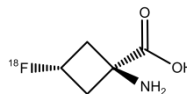

---

208547 Gallium Ga 68 dotatate  
(06/01) (1027785-90-5)

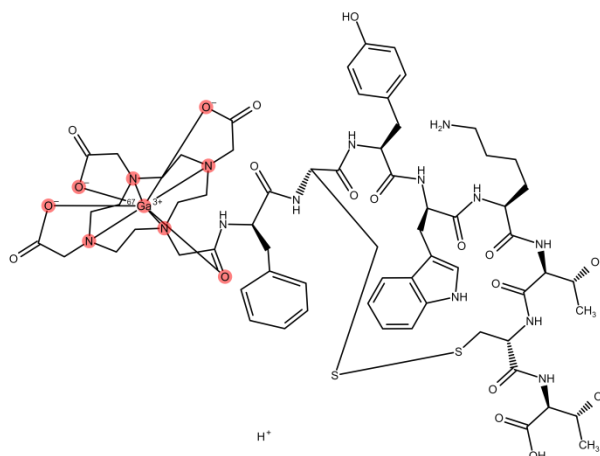

---

Sofosbuvir<sup>a</sup>  
(1190307-88-0)

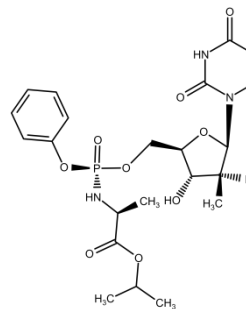

208341

(06/28)

---

Velpatasvir  
(1377049-84-7)

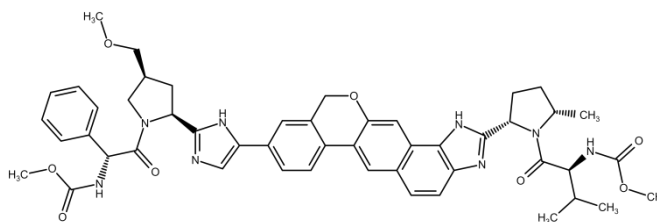

---

208073

Lifitegrast

(07/11)

(1025967-78-5)

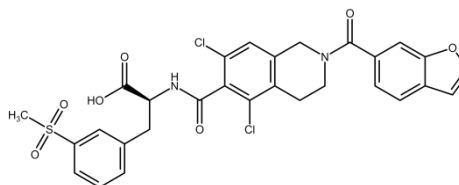

---

208471

Lixisenatide

(07/27)

(320367-13-3)

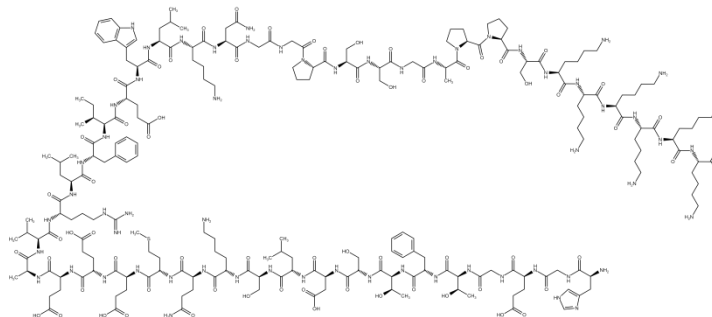

206488  
(09/19)

Eteplirsen  
(1173755-55-9)

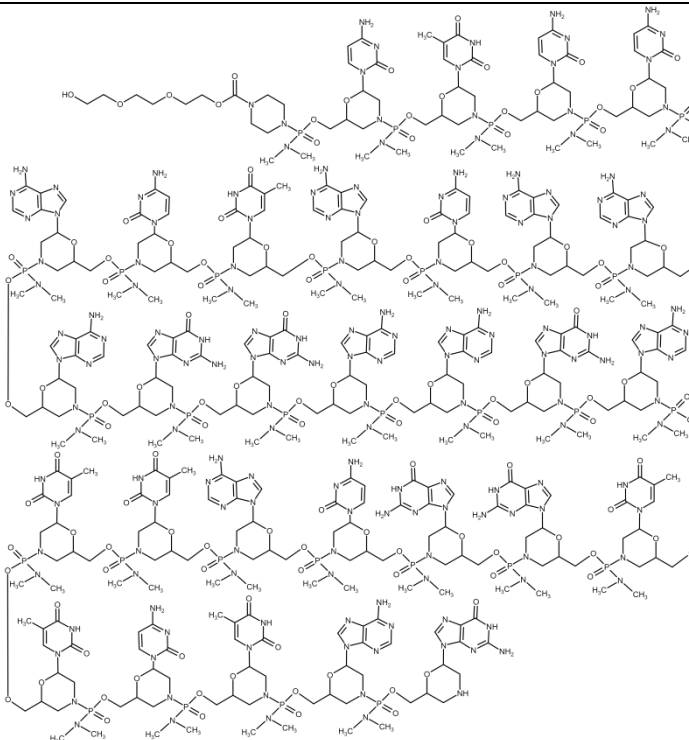

207695  
(12/14)

Crisaborole  
(906673-24-3)

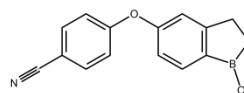

209115  
(12/19)

Rucaparib  
(283173-50-2)

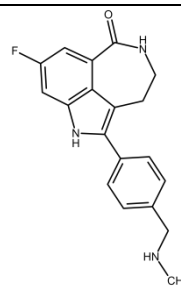

---

209531            Nusinersen  
(12/23)            (1258984-36-9)

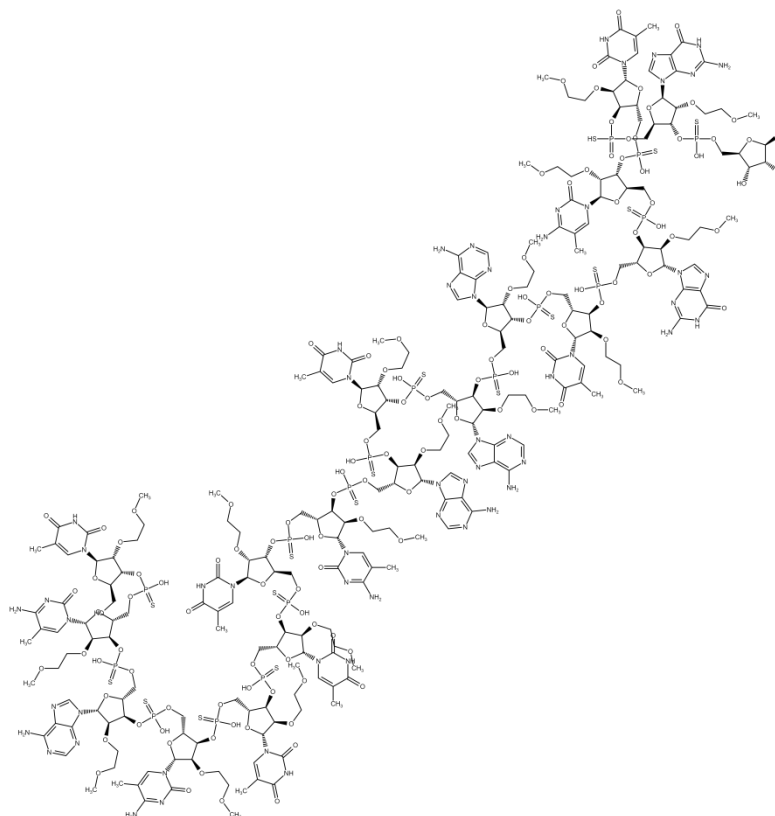

---

<sup>a</sup> Approved in 2013

<sup>b</sup> Chemical structure was obtained from <https://chem.sis.nlm.nih.gov/chemidplus/>, accessed January 2017, except for defibrotide sodium whose structure was obtained from the DEFITELIO Product Label.

Supplemental Table 3. Inhibition DDIs, NME as substrate

| Victim Drug<br>(Dose)          | Inhibitor (Dose)                                   | Main<br>Enzymes /<br>Transporters<br>Possibly<br>Involved | AUC<br>Ratio | C <sub>max</sub><br>Ratio | Study Design /<br>Population                    | Labeling Impact                                                                                                                                     | Reference    |
|--------------------------------|----------------------------------------------------|-----------------------------------------------------------|--------------|---------------------------|-------------------------------------------------|-----------------------------------------------------------------------------------------------------------------------------------------------------|--------------|
| <i>AUC ratios ≥ 5</i>          |                                                    |                                                           |              |                           |                                                 |                                                                                                                                                     |              |
| Paritaprevir (300 mg SD)       | Ritonavir (100 mg SD)                              | CYP3A, P-gp, BCRP, OATP1B1/3                              | 47.43        | 28.07                     | Parallel / 6 healthy subjects per group         | Combination drug; risk of increased plasma concentrations of paritaprevir with strong CYP3A inhibitors and inhibitors of P-gp, BCRP, and OATPP1B1/3 | (FDA, 2014m) |
| Eliglustat (100 mg QD 18 days) | Ketoconazole/par oxetine (400 mg/30 mg QD 10 days) | CYP3A <sup>a</sup> , CYP2D6                               | 37.85 (PBPK) | 18.25 (PBPK)              | One-sequence / 36 healthy subjects (CYP2D6 EMs) | Contraindicate with strong CYP2D6 inhibitors concomitantly with strong CYP3A4 inhibitors in CYP2D6 EMs                                              | (FDA, 2014c) |



|                                                        |                                                   |                             |                               |                               |                                                 |                                                                                                            |              |
|--------------------------------------------------------|---------------------------------------------------|-----------------------------|-------------------------------|-------------------------------|-------------------------------------------------|------------------------------------------------------------------------------------------------------------|--------------|
| Eliglustat (100 mg BID 17 days)                        | Paroxetine (30 mg QD 10 days)                     | CYP2D6                      | 28.40                         | 22.00                         | One-sequence / 1 healthy subject (CYP2D6 UM)    | Reduce dose of eliglustat with strong CYP2D6 inhibitors in CYP2D6 EMs                                      | (FDA, 2014c) |
| Eliglustat (100 mg BID 18 days)                        | Ketoconazole/paroxetine (400 mg/30 mg QD 10 days) | CYP3A <sup>a</sup> , CYP2D6 | 24.16 (PBPK)                  | 16.68 (PBPK)                  | One-sequence / 36 healthy subjects (CYP2D6 EMs) | Contraindicate with strong CYP2D6 inhibitors concomitantly with strong CYP3A4 inhibitors in CYP2D6 EMs     | (FDA, 2014c) |
| Ibrutinib (120 mg (alone), 40 mg with ketoconazole SD) | Ketoconazole (400 mg QD 6 days)                   | CYP3A                       | 23.90                         | 28.60                         | One-sequence / 18 healthy males                 | Avoid strong CYP3A inhibitors                                                                              | (FDA, 2013g) |
| Eliglustat (100 mg QD 18 days)                         | Fluconazole/terbinafine (400 mg loading dose then | CYP3A, CYP2D6               | 19.31 (AUC <sub>0-24h</sub> ) | 10.71 (AUC <sub>0-24h</sub> ) | One-sequence / 10 healthy subjects              | Contraindicate with moderate CYP2D6 inhibitors concomitantly with moderate CYP3A4 inhibitors in CYP2D6 EMs | (FDA, 2014c) |

|                                 |                                                                             |                                |                               |                               |                                      |                                                                                                            |              |
|---------------------------------|-----------------------------------------------------------------------------|--------------------------------|-------------------------------|-------------------------------|--------------------------------------|------------------------------------------------------------------------------------------------------------|--------------|
|                                 | 200 mg/250 mg                                                               |                                | PBPK)                         | PBPK)                         | (CYP2D6                              |                                                                                                            |              |
|                                 | QD 10 days)                                                                 |                                |                               |                               | EMs)                                 |                                                                                                            |              |
| Grazoprevir (200 mg QD 13 days) | Cyclosporine (400 mg SD)                                                    | OATP1B1/3 <sup>b</sup>         | 15.25 (AUC <sub>0-24h</sub> ) | 17.03                         | One-sequence / 13 healthy nonsmokers | Contraindicate with OATP1B1/3 inhibitors                                                                   | (FDA, 2016d) |
| Eliglustat (100 mg BID 18 days) | Fluconazole/terbinafine (400 mg loading dose then 200 mg/250 mg QD 10 days) | CYP3A, CYP2D6                  | 13.58 (AUC <sub>0-12h</sub> ) | 10.16 (AUC <sub>0-12h</sub> ) | One-sequence / 10 healthy subjects   | Contraindicate with moderate CYP2D6 inhibitors concomitantly with moderate CYP3A4 inhibitors in CYP2D6 EMs | (FDA, 2014c) |
| Grazoprevir (200 mg QD 7 days)  | Lopinavir/ritonavir (400 mg/100 mg BID 7 days)                              | CYP3A4, OATP1B1/3 <sup>b</sup> | 12.87                         | 7.31                          | One-sequence / 13 healthy nonsmokers | Contraindicate with OATP1B1/3 inhibitors and not recommend with certain strong CYP3A4 inhibitors           | (FDA, 2016d) |
| Naloxegol (25 mg SD)            | Ketoconazole (400 mg QD 5 days)                                             | CYP3A4 <sup>a</sup>            | 12.42                         | 9.12                          | One-sequence / 22 healthy subjects   | Contraindicate with strong CYP3A4                                                                          | (FDA, 2014h) |

|                                 |                                                |                               |             |             |                                                 |                                                                                                 |              |
|---------------------------------|------------------------------------------------|-------------------------------|-------------|-------------|-------------------------------------------------|-------------------------------------------------------------------------------------------------|--------------|
| Grazoprevir (200 mg QD 7 days)  | Atazanavir/ritonavir (300 mg/100 mg QD 7 days) | CYP3A, OATP1B1/3 <sup>b</sup> | 10.56       | 6.24        | One-sequence / 11 healthy nonsmokers            | Contraindicate with OATP1B1/3 inhibitors and not recommend with certain strong CYP3A inhibitors | (FDA, 2016d) |
| Grazoprevir (200 mg SD)         | Rifampin (600 mg single IV)                    | OATP1B1/3                     | 10.22       | 10.96       | One-sequence / 12 healthy nonsmokers            | Contraindicate with OATP1B1/3 inhibitors                                                        | (FDA, 2016d) |
| Eliglustat (100 mg BID 17 days) | Paroxetine (30 mg QD 10 days)                  | CYP2D6                        | 10.00       | 8.20        | One-sequence / 24 healthy subjects (CYP2D6 EMs) | Reduce dose of eliglustat with strong CYP2D6 inhibitors in CYP2D6 EMs                           | (FDA, 2014c) |
| Dasabuvir (400 mg SD)           | Gemfibrozil (600 mg BID 5 days)                | CYP2C8                        | 9.90        | 1.91        | One-sequence / 11 healthy subjects              | Contraindicate with strong CYP2C8 inhibitors                                                    | (FDA, 2014m) |
| Eliglustat (100 mg BID 18 days) | Ketoconazole/paroxetine (400 mg/30 mg QD 10)   | CYP3A <sup>a</sup> , CYP2D6   | 9.81 (PBPK) | 7.48 (PBPK) | One-sequence / 36 healthy subjects              | Contraindicate with strong CYP2D6 inhibitors concomitantly with strong CYP3A4 inhibitors in     | (FDA, 2014c) |

|                                 | days)                             |                        |             |             | (CYP2D6<br>IMs)                      | CYP2D6 IMs                                                        |              |
|---------------------------------|-----------------------------------|------------------------|-------------|-------------|--------------------------------------|-------------------------------------------------------------------|--------------|
| Ibrutinib (dosing regimen N/P)  | Erythromycin (dosing regimen N/P) | CYP3A                  | 8.60 (PBPK) | N/P         | N/P                                  | Avoid moderate CYP3A inhibitors; if not, reduce dose of ibrutinib | (FDA, 2013g) |
| Grazoprevir (200 mg SD)         | Rifampin (600 mg SD)              | OATP1B1/3 <sup>b</sup> | 8.37        | 6.52        | One-sequence / 12 healthy nonsmokers | Contraindicate with OATP1B1/3 inhibitors                          | (FDA, 2016d) |
| Ivabradine (dosing regimen N/P) | Josamycin (dosing regimen N/P)    | CYP3A4 <sup>d</sup>    | 7.70        | 3.60        | N/P                                  | Contraindicate with strong CYP3A4 inhibitors                      | (FDA, 2015c) |
| Ivabradine (dosing regimen N/P) | Ketoconazole (200 mg QD)          | CYP3A4 <sup>d</sup>    | 7.70        | 3.60        | N/P                                  | Contraindicate with strong CYP3A4 inhibitors                      | (FDA, 2015c) |
| Eliglustat (100 mg BID 18 days) | Fluconazole (200 mg QD 11 days)   | CYP3A                  | 7.54 (PBPK) | 3.76 (PBPK) | One-sequence / 10 healthy            | Not recommend with moderate CYP3A inhibitors in CYP2D6 PMs        | (FDA, 2014c) |

|                                |                                                |                               |                                   |                                   |                                                                | subjects                                                                                        |  |  |              |
|--------------------------------|------------------------------------------------|-------------------------------|-----------------------------------|-----------------------------------|----------------------------------------------------------------|-------------------------------------------------------------------------------------------------|--|--|--------------|
|                                |                                                |                               |                                   |                                   |                                                                | (CYP2D6                                                                                         |  |  |              |
|                                |                                                |                               |                                   |                                   |                                                                | PMs)                                                                                            |  |  |              |
| Grazoprevir (200 mg QD 7 days) | Darunavir/ritonavir (600 mg/100 mg BID 7 days) | CYP3A, OATP1B1/3 <sup>b</sup> | 7.49                              | 5.27                              | One-sequence / 11 healthy nonsmokers                           | Contraindicate with OATP1B1/3 inhibitors and not recommend with certain strong CYP3A inhibitors |  |  | (FDA, 2016d) |
| Simeprevir (200 mg QD 7 days)  | Ritonavir (100 mg BID 15 days)                 | CYP3A <sup>a</sup>            | 7.18                              | 4.70                              | N/P /12 subjects                                               | Not recommend with ritonavir                                                                    |  |  | (FDA, 2013i) |
| Tasimelteon (5 mg SD)          | Fluvoxamine (50 mg QD 7 days)                  | CYP1A2 <sup>c</sup>           | 6.87                              | 2.28                              | One-sequence / 24 healthy subjects                             | Avoid strong CYP1A2 inhibitors                                                                  |  |  | (FDA, 2014f) |
| Pirfenidone (801 mg SD)        | Fluvoxamine (50-100 mg QD or BID 10 days)      | CYP1A2                        | 6.81 (smokers), 3.97 (nonsmokers) | 2.24 (smokers), 1.69 (nonsmokers) | One-sequence / healthy subjects (26 smokers and 25 nonsmokers) | Reduce dose of pirfenidone with strong or moderate CYP1A2 inhibitors                            |  |  | (FDA, 2014d) |

|                               |                                    |                    |      |      |                                        | nonsmokers)                                                                                                                                                                                                                                  |  |              |
|-------------------------------|------------------------------------|--------------------|------|------|----------------------------------------|----------------------------------------------------------------------------------------------------------------------------------------------------------------------------------------------------------------------------------------------|--|--------------|
| Cobimetinib (10 mg SD)        | Itraconazole (200 mg QD 14 days)   | CYP3A <sup>a</sup> | 6.62 | 3.17 | One-sequence / 15 healthy subjects     | Avoid CYP3A strong inhibitors                                                                                                                                                                                                                |  | (FDA, 2015d) |
| Simeprevir (150 mg QD 7 days) | Erythromycin (500 mg TID 6.5 days) | CYP3A <sup>a</sup> | 6.54 | 4.02 | Random crossover / 24 healthy subjects | Not recommend with erythromycin; caution for potential increased plasma concentrations of simeprevir with moderate or strong inhibitors of CYP3A                                                                                             |  | (FDA, 2013i) |
| Flibanserin (100 mg SD)       | Fluconazole (200 mg QD 6 days)     | CYP3A4, CYP2C19    | 6.41 | 2.11 | One-sequence / 15 healthy females      | Contraindicate with CYP3A4 moderate inhibitors                                                                                                                                                                                               |  | (FDA, 2015a) |
| Venetoclax (50 mg SD)         | Ketoconazole (400 mg QD 7 days)    | CYP3A, P-gp        | 6.40 | 2.33 | One-sequence / 11 patients             | Contraindicate with strong CYP3A inhibitors at initiation and during ramp-up phase; if strong CYP3A inhibitors must be used after the ramp-up phase, reduce dose of venetoclax; avoid P-gp inhibitors, if not, reduce dose of venetoclax and |  | (FDA, 2016e) |

monitor for signs of venetoclax toxicities

|                                               |                                   |                              |             |             |                                                 |                                                                   |              |
|-----------------------------------------------|-----------------------------------|------------------------------|-------------|-------------|-------------------------------------------------|-------------------------------------------------------------------|--------------|
| Eliglustat (100 mg QD 14 days)                | Ketoconazole (400 mg QD 7 days)   | CYP3A <sup>a</sup>           | 6.22 (PBPK) | 4.27 (PBPK) | One-sequence / 36 healthy subjects (CYP2D6 PMs) | Contraindicate with strong CYP3A inhibitors in CYP2D6 PMs         | (FDA, 2014c) |
| Eliglustat (100 mg BID 14 days)               | Ketoconazole (400 mg QD 7 days)   | CYP3A <sup>a</sup>           | 5.54 (PBPK) | 4.55 (PBPK) | One-sequence / 36 healthy subjects (CYP2D6 PMs) | Contraindicate with strong CYP3A inhibitors in CYP2D6 PMs         | (FDA, 2014c) |
| Ibrutinib (dosing regimen N/P)                | Diltiazem (dosing regimen N/P)    | CYP3A                        | 5.50 (PBPK) | N/P         | N/P                                             | Avoid moderate CYP3A inhibitors; if not, reduce dose of ibrutinib | (FDA, 2013g) |
| Isavuconazonium sulfate (prodrug) (200 mg SD) | Ketoconazole (200 mg BID 24 days) | CYP3A, butyrylcholinesterase | 5.22        | 1.09        | N/P                                             | Contraindicate with strong CYP3A4 inhibitors                      | (FDA, 2015e) |

|                                 |                                                                             |                    |             |             |                                                 |                                                                                                            |              |
|---------------------------------|-----------------------------------------------------------------------------|--------------------|-------------|-------------|-------------------------------------------------|------------------------------------------------------------------------------------------------------------|--------------|
| Eliglustat (100 mg BID 17 days) | Paroxetine (30 mg QD 10 days)                                               | CYP2D6             | 5.20        | 4.10        | One-sequence / 8 healthy subjects (CYP2D6 IMs)  | Reduce dose of eliglustat with strong CYP2D6 inhibitors in CYP2D6 IMs                                      | (FDA, 2014c) |
| $2 \leq AUC \text{ ratios} < 5$ |                                                                             |                    |             |             |                                                 |                                                                                                            |              |
| Eliglustat (100 mg BID 18 days) | Fluconazole/terbinafine (400 mg loading dose then 200 mg/250 mg QD 10 days) | CYP3A, CYP2D6      | 4.99 (PBPK) | 4.16 (PBPK) | One-sequence / 10 healthy subjects (CYP2D6 IMs) | Contraindicate with moderate CYP2D6 inhibitors concomitantly with moderate CYP3A4 inhibitors in CYP2D6 IMs | (FDA, 2014c) |
| Elbasvir (50 mg QD 7 days)      | Atazanavir/ritonavir (300 mg/100 mg QD 7 days)                              | CYP3A <sup>a</sup> | 4.77        | 4.15        | One-sequence / 8 healthy nonsmokers             | Not recommend with certain strong CYP3A inhibitors                                                         | (FDA, 2016d) |
| Flibanserin (50 mg SD)          | Ketoconazole (400 mg QD 5 days)                                             | CYP3A4             | 4.61        | 1.84        | Random crossover / 20 healthy                   | Contraindicate with CYP3A4 strong inhibitors                                                               | (FDA, 2015a) |



---

females

|                               |                                |                                    |                     |                |                 |                                                             |                                                                                                      |                 |
|-------------------------------|--------------------------------|------------------------------------|---------------------|----------------|-----------------|-------------------------------------------------------------|------------------------------------------------------------------------------------------------------|-----------------|
| Naloxegol<br>mg SD)           | (25<br>(dosing regimen<br>N/P) | Erythromycin                       | CYP3A4 <sup>a</sup> | 4.60<br>(PBPK) | N/P             | N/P                                                         | Avoid moderate CYP3A4 inhibitors, if not, reduce dose of naloxegol and monitor for adverse reactions | (FDA,<br>2014h) |
| Sofosbuvir<br>mg SD)          | (400<br>mg SD)                 | Cyclosporine (600<br>mg SD)        | P-gp, BCRP          | 4.53           | 2.54            | N/P / 19<br>healthy<br>subjects                             | None                                                                                                 | (FDA,<br>2016b) |
| Eliglustat<br>mg BID 18 days) | (100<br>mg QD 10 days)         | Terbinafine (250<br>mg QD 10 days) | CYP2D6              | 4.49<br>(PBPK) | 280.2<br>(PBPK) | One-sequence<br>/ 10 healthy<br>subjects<br>(CYP2D6<br>EMs) | Reduce dose of eliglustat with moderate CYP2D6 inhibitors in CYP2D6 EMs                              | (FDA,<br>2014c) |
| Eliglustat<br>mg BID 14 days) | (100<br>mg QD 7 days)          | Ketoconazole (400<br>mg QD 7 days) | CYP3A <sup>a</sup>  | 4.40           | 4.25            | One-sequence<br>/ 24 healthy<br>subjects<br>(CYP2D6         | Reduce dose of eliglustat with strong CYP3A inhibitors in CYP2D6 EMs                                 | (FDA,<br>2014c) |

|                                |                                                                                                                                                                     |                    |             |             | EMs)                                           |                                 |  |              |
|--------------------------------|---------------------------------------------------------------------------------------------------------------------------------------------------------------------|--------------------|-------------|-------------|------------------------------------------------|---------------------------------|--|--------------|
| Cobimetinib (60 mg QD 35 days) | Erythromycin (500 mg TID 35 days)                                                                                                                                   | CYP3A <sup>a</sup> | 4.27 (PBPK) | 3.76 (PBPK) | PBPK modeling/ simulations of healthy subjects | Avoid CYP3A moderate inhibitors |  | (FDA, 2015d) |
| Sofosbuvir (400 mg QD 7 days)  | Atazanavir/ritonavir/emtricitabine/tenofovir DF (atazavanir/ritonavir 400/100 mg + emtricitabine 200 mg + tenofovir disoproxil fumarate 300 mg QD at least 4 weeks) | P-gp               | 4.22        | 2.04        | Parallel / 16 patients                         | None                            |  | (FDA, 2013l) |

|                                 |                                     |                    |                  |      |                                                |                                                                                                |              |
|---------------------------------|-------------------------------------|--------------------|------------------|------|------------------------------------------------|------------------------------------------------------------------------------------------------|--------------|
| Eluxadoline (100 mg SD)         | Cyclosporine (600 mg SD)            | OATP1B1            | 4.20             | 6.81 | Random crossover / 30 healthy subjects         | Avoid OATP1B1 inhibitors; if not, reduce dose of eluxadaline and monitor for adverse reactions | (FDA, 2015p) |
| Eliglustat (100 mg BID 14 days) | Ketoconazole (400 mg QD 7 days)     | CYP3A <sup>a</sup> | 4.10             | 3.05 | One-sequence / 8 healthy subjects (CYP2D6 IMs) | Contraindicate with strong CYP3A inhibitors in CYP2D6 IMs                                      | (FDA, 2014c) |
| Macitentan (10 mg SD)           | Ritonavir (100 mg BID 15 days)      | CYP3A4             | 3.00-4.00 (PBPK) | N/P  | N/P / 100 healthy subjects                     | Avoid strong CYP3A4 inhibitors                                                                 | (FDA, 2013j) |
| Cariprazine (0.5 mg QD 14 days) | Ketoconazole (400 mg QD)            | CYP3A4             | 3.78             | 3.27 | N/P / 16 patients                              | Reduce dose of cariprazine with CYP3A4 strong inhibitors                                       | (FDA, 2015q) |
| Elbasvir (50 mg QD 7 days)      | Lopinavir/ritonavir (400 mg/100 mg) | CYP3A <sup>a</sup> | 3.70             | 2.87 | One-sequence / 9 healthy subjects              | Not recommend with certain strong CYP3A inhibitors                                             | (FDA, 2016d) |

|                                  |                                                                                                                                            | BID 7 days)                  |      |      | nonsmokers                             |                                        |  |              |
|----------------------------------|--------------------------------------------------------------------------------------------------------------------------------------------|------------------------------|------|------|----------------------------------------|----------------------------------------|--|--------------|
| Sofosbuvir (400 mg SD)           | Cyclosporine (600 mg SD)                                                                                                                   | P-gp, BCRP                   | 3.57 | 2.22 | Random crossover / 19 healthy subjects | None                                   |  | (FDA, 2013l) |
| Paritaprevir (150 mg QD 28 days) | Lopinavir/ritonavir (800 mg/200 mg QD 14 days)                                                                                             | CYP3A, P-gp, BCRP, OATP1B1/3 | 3.55 | 1.78 | One-sequence / 11 healthy subjects     | Not recommend with lopinavir/ritonavir |  | (FDA, 2014m) |
| Sofosbuvir (400 mg QD 7 days)    | Raltegravir/emtricitabine/tenofovir DF (raltegravir 400 mg BID + emtricitabine 200 mg + tenofovir disoproxil fumarate 300 mg QD at least 4 | P-gp                         | 3.32 | 2.17 | Parallel / 13 patients                 | None                                   |  | (FDA, 2013l) |

|                                 |                                 | weeks)              |             |             |                                                 |                                                                                                     |  |  |  |  |              |
|---------------------------------|---------------------------------|---------------------|-------------|-------------|-------------------------------------------------|-----------------------------------------------------------------------------------------------------|--|--|--|--|--------------|
| Cobimetinib (60 mg SD)          | diltiazem (1200 mg BID)         | CYP3A <sup>a</sup>  | 3.26 (PBPK) | 1.85 (PBPK) | PBPK modeling /simuations of healthy subjects   | Avoid CYP3A moderate inhibitors                                                                     |  |  |  |  | (FDA, 2015d) |
| Naloxegol (25 mg SD)            | Diltiazem (240 mg QD 5 days)    | CYP3A4 <sup>a</sup> | 3.24        | 2.78        | One-sequence / 43 healthy subjects              | Avoid moderate CYP3A inhibitors; if not, reduce dose of naloxegol and monitor for adverse reactions |  |  |  |  | (FDA, 2014h) |
| Eliglustat (100 mg BID 18 days) | Fluconazole (200 mg QD 10 days) | CYP3A               | 3.21 (PBPK) | 3.04 (PBPK) | One-sequence / 10 healthy subjects (CYP2D6 EMs) | Reduce dose of eliglustat with moderate CYP3A inhibitors in CYP2D6 EMs                              |  |  |  |  | (FDA, 2014c) |
| Sofosbuvir (400 mg QD 12 or 24) | Simeprevir (150 mg QD 12 or 24) | P-gp                | 3.16        | 1.91        | N/P / 22 subjects                               | None                                                                                                |  |  |  |  | (FDA, 2013i) |

| weeks)                          | weeks)                           |                     |      |      |                                              |                                                                      |              |  |  |
|---------------------------------|----------------------------------|---------------------|------|------|----------------------------------------------|----------------------------------------------------------------------|--------------|--|--|
| Grazoprevir (100 mg SD)         | Ketoconazole (400 mg QD)         | CYP3A <sup>b</sup>  | 3.02 | 2.01 | N/P / 8 healthy subjects                     | Not recommend with ketoconazole and certain strong CYP3A inhibitors  | (FDA, 2016d) |  |  |
| Daclatasvir (10 mg SD)          | Ketoconazole (400 mg QD 9 days)  | CYP3A <sup>a</sup>  | 3.01 | 1.57 | One-sequence / 13 healthy subjects           | Reduce dose of daclatasvir with CYP3A strong inhibitors              | (FDA, 2015f) |  |  |
| Pimavanserin (40 mg SD)         | Ketoconazole (400 mg QD 14 days) | CYP3A4              | 3.01 | 1.47 | One-sequence / 19 subjects                   | Reduce dose of pimavanserin with strong CYP3A inhibitors             | (FDA, 2016c) |  |  |
| Eliglustat (100 mg BID 17 days) | Ketoconazole (30 mg QD 10 days)  | CYP3A <sup>a</sup>  | 3.00 | 2.20 | One-sequence / 1 healthy subject (CYP2D6 UM) | Reduce dose of eliglustat with strong CYP3A inhibitors in CYP2D6 EMs | (FDA, 2014c) |  |  |
| Ivabradine (dosing regimen)     | Diltiazem (120 mg BID)           | CYP3A4 <sup>a</sup> | 3.00 | 2.50 | N/P                                          | Avoid strong CYP3A4 inhibitors                                       | (FDA, 2015c) |  |  |

| N/P)                                                         |                                                          |                    |             |             |                                                 |                                                                                          |              |  |
|--------------------------------------------------------------|----------------------------------------------------------|--------------------|-------------|-------------|-------------------------------------------------|------------------------------------------------------------------------------------------|--------------|--|
| Eliglustat (100 mg QD 18 days)                               | Fluconazole (200 mg QD 11 days)                          | CYP3A              | 2.95 (PBPK) | 2.38 (PBPK) | One-sequence / 10 healthy subjects (CYP2D6 PMs) | Contraindicate with strong CYP3A4 inhibitors in CYP2D6 PMs                               | (FDA, 2014c) |  |
| Ceritinib (450 mg SD)                                        | Ketoconazole (200 mg BID 14 days)                        | CYP3A <sup>a</sup> | 2.88        | 1.23        | One-sequence / 19 healthy subjects              | Avoid strong CYP3A inhibitors; if not, adjust dose of ceritinib                          | (FDA, 2014p) |  |
| Eliglustat (100 mg BID 18 days)                              | Fluconazole (400 mg loading dose then 200 mg QD 11 days) | CYP3A              | 2.85 (PBPK) | 2.85 (PBPK) | One-sequence / 10 healthy subjects (CYP2D6 IMs) | Not recommend with moderate CYP3A inhibitors in CYP2D6 IMs                               | (FDA, 2014c) |  |
| Paritaprevir (paritaprevir/ritonavir 150 mg/100 mg QD in the | Atazanavir/ritonavir (300 mg /100 mg QD in the           | CYP3A, P-gp, BCRP, | 2.81        | 1.79        | One-sequence / 10 healthy                       | When co-administered with VIEKIRA PAK, atazanavir 300 mg (without ritonavir) should only | (FDA, 2014m) |  |

|                                        |                                   |        |             |             |                                         |          |                                                                                                      |              |
|----------------------------------------|-----------------------------------|--------|-------------|-------------|-----------------------------------------|----------|------------------------------------------------------------------------------------------------------|--------------|
| mg QD + evening 14 days)               | OATP1B1/3                         |        |             |             |                                         | subjects | be given in the morning                                                                              |              |
| ombitasvir 25 mg                       |                                   |        |             |             |                                         |          |                                                                                                      |              |
| QD in the morning +                    |                                   |        |             |             |                                         |          |                                                                                                      |              |
| dasabuvir 400 mg                       |                                   |        |             |             |                                         |          |                                                                                                      |              |
| BID 28 days)                           |                                   |        |             |             |                                         |          |                                                                                                      |              |
| Naloxegol (25 mg SD)                   | Fluconazole (dosing regimen N/P)  | CYP3A4 | 2.80 (PBPK) | N/P         | N/P                                     |          | Avoid moderate CYP3A4 inhibitors, if not, reduce dose of naloxegol and monitor for adverse reactions | (FDA, 2014h) |
| Sonidegib (200 mg QD for steady state) | Erythromycin (500 mg QD 120 days) | CYP3A  | 2.80 (PBPK) | 2.40 (PBPK) | PBPK modeling / simulations of patients |          | Avoid long term use of CYP3A moderate inhibitors                                                     | (FDA, 2015j) |
| Suvorexant (4 mg SD)                   | Ketoconazole (400 mg QD 11 days)  | CYP3A  | 2.79        | 1.23        | One-sequence / 11 healthy males         |          | Not recommend with strong CYP3A inhibitors                                                           | (FDA, 2014b) |



|                                                                       |                                               |                        |      |      |                                                       |                                                                |              |
|-----------------------------------------------------------------------|-----------------------------------------------|------------------------|------|------|-------------------------------------------------------|----------------------------------------------------------------|--------------|
| Ospemifene (60 mg SD)                                                 | Fluconazole (200 mg QD 8 days)                | CYP3A, CYP2C9, CYP2C19 | 2.78 | 1.58 | Random crossover / 14 post-menopausal healthy females | Not recommend with fluconazole                                 | (FDA, 2013k) |
| Simeprevir (150 mg QD 20 days)                                        | Ledipasvir (30 mg QD 10 days)                 | P-gp                   | 2.69 | 2.61 | N/P / 28 subjects                                     | None                                                           | (FDA, 2013i) |
| Olaparib (100 mg SD)                                                  | Itraconazole (200 mg QD 8 days)               | CYP3A <sup>a</sup>     | 2.59 | 1.36 | One-sequence / 56 patients                            | Avoid strong CYP3A inhibitors; if not, adjust dose of olaparib | (FDA, 2014g) |
| Simeprevir (150 mg (alone), 50 mg with darunavir/ritonavir QD 7 days) | Darunavir/ritonavir (800 mg/100 mg QD 7 days) | CYP3A <sup>a</sup>     | 2.59 | 1.79 | Random crossover / 21 healthy subjects                | Not recommend with darunavir/ritonavir                         | (FDA, 2013i) |
| Flibanserin (50 mg)                                                   | Itraconazole (200 mg)                         | CYP3A4,                | 2.58 | 1.70 | Random crossover / 12                                 | Contraindicate with CYP3A4 strong inhibitors                   | (FDA,        |

|                               |                                                                                                                                                                   |                   |      |      |                        |                                                                                                         |  |              |
|-------------------------------|-------------------------------------------------------------------------------------------------------------------------------------------------------------------|-------------------|------|------|------------------------|---------------------------------------------------------------------------------------------------------|--|--------------|
| mg SD)                        | mg QD 7 days)                                                                                                                                                     | CYP2C19           |      |      | healthy subjects       |                                                                                                         |  | 2015a)       |
| Riociguat (single dose)       | Ketoconazole (400 mg QD repeated doses)                                                                                                                           | CYP3A, P-gp, BCRP | 2.50 | N/P  | N/P / healthy subjects | Adjust starting dose of riociguat with strong P450 and P-gp/BCRP inhibitors and monitor for hypotension |  | (FDA, 2013a) |
| Sofosbuvir (400 mg QD 7 days) | Darunavir/ritonavir/emtricitabine/tenofovir DF (darunavir/ritonavir 800/100 mg + emtricitabine 200 mg + tenofovir disoproxil fumarate 300 mg QD at least 4 weeks) | P-gp              | 2.49 | 1.12 | Parallel / 13 patients | None                                                                                                    |  | (FDA, 2013l) |
| Velpatasvir (100              | Atazanavir/ritonavir                                                                                                                                              | CYP3A, P-gp,      | 2.43 | 1.55 | Random                 | None                                                                                                    |  | (FDA,        |

|                           |                                                                                                                                                |                     |      |                                  |                                                 |                                       |  |                 |
|---------------------------|------------------------------------------------------------------------------------------------------------------------------------------------|---------------------|------|----------------------------------|-------------------------------------------------|---------------------------------------|--|-----------------|
| mg QD 10 days)            | ir/emtricitabine/te<br>nofovir DF<br>(atazanavir: 300<br>mg; ritonavir 100<br>mg;<br>emtricitabine/tenof<br>ovir DF: 200/300<br>mg QD 10 days) | BCRP                |      |                                  |                                                 | crossover / 24<br>healthy<br>subjects |  | 2016b)          |
| Netupitant (300<br>mg SD) | Ketoconazole (400<br>mg QD 12 days)                                                                                                            | CYP3A4 <sup>a</sup> | 2.42 | 1.19                             | Random<br>crossover / 18<br>healthy<br>subjects | None                                  |  | (FDA,<br>2014m) |
| Macitentan (10<br>mg SD)  | Ketoconazole (400<br>mg QD 24 days)                                                                                                            | CYP3A4              | 2.32 | 1.28<br>(AUC <sub>tau</sub><br>) | Random<br>crossover / 10<br>healthy<br>subjects | Avoid strong CYP3A4 inhibitors        |  | (FDA,<br>2013j) |
| Sofosbuvir (400           | Velpatasvir (150                                                                                                                               | P-gp, BCRP          | 2.38 | 1.81                             | One-sequence                                    | None (combination drug)               |  | (FDA,           |

|                                 |                                                      |                     |             |      |                                         |                                                                                            |                                     |        |
|---------------------------------|------------------------------------------------------|---------------------|-------------|------|-----------------------------------------|--------------------------------------------------------------------------------------------|-------------------------------------|--------|
| mg SD)                          | mg QD 10 days)                                       |                     |             |      |                                         | / 18 healthy subjects                                                                      |                                     | 2016b) |
| Vortioxetine (10 mg QD 28 days) | Bupropion (75 mg BID 3 days then 150 mg BID 11 days) | CYP2D6              | 2.28        | 2.14 | One-sequence / 24 healthy subjects      | Reduce dose of vortioxetine with strong CYP2D6 inhibitors                                  | (FDA, 2013e; Mogalian et al., 2016) |        |
| Sonidegib (800 mg SD)           | Ketoconazole (200 mg BID 14 days)                    | CYP3A               | 2.26        | 1.50 | Parallel / 15 healthy subjects          | Avoid CYP3A strong inhibitors                                                              | (FDA, 2015j)                        |        |
| Daclatasvir (60 mg QD 7 days)   | Simeprevir (150 mg QD 7 days)                        | CYP3A <sup>a</sup>  | 2.20        | 1.60 | Random crossover /15 healthy nonsmokers | Reduce dose of daclatasvir with simeprevir                                                 | (FDA, 2015f)                        |        |
| Naloxegol (25 mg SD)            | Verapamil (dosing regimen N/P)                       | CYP3A4 <sup>a</sup> | 2.20 (PBPK) | N/P  | N/P                                     | Avoid moderate CYP3A4 inhibitors, if not, reduce dose of naloxegol and monitor for adverse | (FDA, 2014h)                        |        |

|                                                           |                                                                 |                     |      |      |                                                                    |                                                              | reactions                        |                 |
|-----------------------------------------------------------|-----------------------------------------------------------------|---------------------|------|------|--------------------------------------------------------------------|--------------------------------------------------------------|----------------------------------|-----------------|
| Ivabradine<br>(dosing regimen<br>N/P)                     | Grapefruit juice<br>(doing regimen<br>N/P)                      | CYP3A4 <sup>a</sup> | 2.20 | 1.60 | N/P                                                                |                                                              | Avoid moderate CYP3A4 inhibitors | (FDA,<br>2015c) |
| Brexiprazole (2<br>mg SD)                                 | Ketoconazole (200<br>mg BID 7 days)                             | CYP3A <sup>a</sup>  | 2.17 | 1.18 | One-sequence<br>/12 healthy<br>subjects<br>(CYP2D6<br>EMs and IMs) | Reduce dose of brexpiprazole with CYP3A strong<br>inhibitors | (FDA,<br>2015l)                  |                 |
| Daclatasvir (60<br>mg QD 4 days +<br>20 mg QD 10<br>days) | Atazanavir/ritonavir<br>(300 mg/100 mg<br>QD 10 days)           | CYP3A <sup>a</sup>  | 2.10 | 1.35 | One-sequence<br>/ 14 healthy<br>subjects                           | Reduce dose of daclatasvir with strong CYP3A<br>inhibitors   | (FDA,<br>2015f)                  |                 |
| Ledipasvir (90<br>mg QD 10 days)                          | Atazanavir/ritonavir<br>(atazanavir/ritonavir<br>300 mg/100 mg) | P-gp                | 2.05 | 1.93 | Random<br>crossover / 30<br>healthy                                | None                                                         | (FDA,<br>2014e)                  |                 |

|                         |             | QD 10 days)                    |                               |            |            | subjects                                                |                                                           |              |
|-------------------------|-------------|--------------------------------|-------------------------------|------------|------------|---------------------------------------------------------|-----------------------------------------------------------|--------------|
| Suvorexant (20 mg SD)   | (20 mg SD)  | Diltiazem (240 mg QD 6 days)   | CYP3A                         | 2.05       | 1.22       | One-sequence / 18 healthy subjects                      | Adjust dose with moderate CYP3A inhibitors                | (FDA, 2014b) |
| Brexiprazole (2 mg SD)  | (2 mg SD)   | Quinidine (324 mg QD 7 days)   | CYP2D6                        | 2.03 (EMs) | 1.12 (EMs) | One-sequence / 11 healthy subjects (CYP2D6 EMs and IMs) | Reduce dose of brexiprazole with strong CYP2D6 inhibitors | (FDA, 2015l) |
| Grazoprevir (200 mg SD) | (200 mg SD) | Ritonavir (100 mg BID 21 days) | CYP3A, OATP1B1/3 <sup>b</sup> | 2.03       | 1.15       | One-sequence / 10 healthy subjects                      | Not recommend with certain strong CYP3A inhibitors        | (FDA, 2016d) |
| Velpatasvir (100 mg SD) | (100 mg SD) | Cyclosporine (600 mg SD)       | P-gp, BCRP                    | 2.03       | 1.56       | Random crossover / 12 healthy subjects                  | None                                                      | (FDA, 2016b) |

|                                                          |                                                        |                                      |                |      |                             |                                                                           |                 |
|----------------------------------------------------------|--------------------------------------------------------|--------------------------------------|----------------|------|-----------------------------|---------------------------------------------------------------------------|-----------------|
| Droxidopa<br>(dosing regimen<br>N/P)                     | DOPA<br>Decarboxylase<br>Inhibitors (not<br>specified) | Catechol-O-<br>methyl<br>transferase | 2.00           | N/P  | N/P                         | Adjust dose of<br>droxidopa with<br>DOPA<br>decarboxylase<br>inhibitors   | (FDA,<br>2014i) |
| Ivabradine<br>(dosing regimen<br>N/P)                    | Verapamil (120<br>mg BID)                              | CYP3A4 <sup>a</sup>                  | 2.00           | 1.90 | N/P                         | Avoid moderate<br>CYP3A4 inhibitors                                       | (FDA,<br>2015c) |
| Olaparib (100 mg<br>SD)                                  | Fluconazole (200<br>mg QD 7 days)                      | CYP3A                                | 2.00<br>(PBPk) | N/P  | Crossover /<br>100 subjects | Avoid moderate<br>CYP3A inhibitors;<br>if not, adjust<br>dose of olaparib | (FDA,<br>2014g) |
| Selexipag<br>(dosing regimen<br>N/P)                     | Lopinavir/ritonavi<br>r (dosing regimen<br>N/P)        | P-gp,<br>OATP1B1/3                   | 2.00           | 2.00 | N/P                         | None                                                                      | (FDA,<br>2015n) |
| <i>1.25 ≤ AUC ratios &lt; 2 with dose recommendation</i> |                                                        |                                      |                |      |                             |                                                                           |                 |
| Isavuconazonium<br>sulfate (prodrug)                     | Lopinavir/ritonavi<br>r (400 mg/100 mg<br>BID)         | CYP3A,<br>butyrylcholine<br>sterase  | 1.96           | 1.74 | N/P                         | Contraindicate with strong<br>CYP3A4 inhibitors                           | (FDA,<br>2015e) |

|                                                       |                                  |                     |      |      |                                                               |                                                                  |              |
|-------------------------------------------------------|----------------------------------|---------------------|------|------|---------------------------------------------------------------|------------------------------------------------------------------|--------------|
| Vorapaxar (20 mg loading dose then 2.5 mg QD 22 days) | Ketoconazole (400 mg QD 28 days) | CYP3A <sup>d</sup>  | 1.96 | 1.93 | Parallel, placebo-controlled / 12 healthy subjects            | Avoid strong inhibitors of CYP3A                                 | (FDA, 2014n) |
| Vilanterol (25 µg SD inhalation)                      | Ketoconazole (400 mg QD 6 days)  | CYP3A4 <sup>a</sup> | 1.90 | 0.89 | Random crossover, placebo-controlled / 18-20 healthy subjects | Caution with strong CYP3A4 inhibitors for cardiovascular effects | (FDA, 2013b) |
| Ledipasvir (30 mg QD 10 days)                         | Simeprevir (150 mg QD 10 days)   | P-gp                | 1.88 | 1.78 | Random crossover / 22 healthy subjects                        | Not recommend with simeprevir                                    | (FDA, 2014e) |
| Edoxaban (60 mg SD)                                   | Ketoconazole (400 mg QD 7 days)  | P-gp                | 1.87 | 1.89 | N/P / healthy subjects                                        | Reduce dose of edoxaban if necessary                             | (FDA, 2015m) |



|                                                                                                               |                                               |                    |      |      |                                    |                                                                                                                  |              |
|---------------------------------------------------------------------------------------------------------------|-----------------------------------------------|--------------------|------|------|------------------------------------|------------------------------------------------------------------------------------------------------------------|--------------|
| Edoxaban (60 mg SD)                                                                                           | Erythromycin (500 mg QID 8 days)              | P-gp               | 1.85 | 1.68 | N/P / healthy subjects             | Reduce dose of edoxaban if necessary                                                                             | (FDA, 2015m) |
| Palbociclib (dosing regimen N/P)                                                                              | Itraconazole (dosing regimen N/P)             | CYP3A <sup>a</sup> | 1.85 | 1.35 | One-sequence / 12 healthy subjects | Avoid CYP3A strong inhibitors                                                                                    | (FDA, 2015h) |
| Edoxaban (60 mg SD)                                                                                           | Dronedarone (400 mg BID repeated dosing)      | P-gp               | 1.84 | 1.45 | N/P / healthy subjects             | Reduce dose of edoxaban if necessary                                                                             | (FDA, 2015m) |
| Paritaprevir (paritaprevir/ritonavir 150 mg/100 mg QD + ombitasvir 25 mg QD in the morning + dasabuvir 400 mg | Atazanavir (300 mg QD in the morning 14 days) | CYP3A, OATP1B1/3   | 1.81 | 1.28 | One-sequence / 10 healthy subjects | When co-administered with VIEKIRA PAK, atazanavir 300 mg (without ritonavir) should only be given in the morning | (FDA, 2014m) |

---

BID 28 days)

|                                        |                                   |                    |             |             |                                              |                                                                                                         |              |
|----------------------------------------|-----------------------------------|--------------------|-------------|-------------|----------------------------------------------|---------------------------------------------------------------------------------------------------------|--------------|
| Elbasvir (50 mg SD)                    | Ketoconazole (400 mg QD)          | CYP3A <sup>a</sup> | 1.80        | 1.89        | N/P / 7 healthy subjects                     | Not recommend with certain strong CYP3A inhibitors                                                      | (FDA, 2016d) |
| Pirfenidone (801 mg SD)                | Ciprofloxacin (750 mg BID 5 days) | CYP1A2             | 1.80        | 1.22        | One-sequence / 27 healthy nonsmoker subjects | Reduce dose of pirfenidone with moderate inhibitors of CYP1A2                                           | (FDA, 2014d) |
| Sonidegib (200 mg QD for steady state) | Erythromycin (500 mg QID 14 days) | CYP3A              | 1.80 (PBPK) | 1.60 (PBPK) | PBPK modeling / simulations of patients      | Monitor for adverse reactions when co-administered with moderate CYP3A inhibitors for less than 14 days | (FDA, 2015j) |
| Idelalisib (400 mg SD)                 | Ketoconazole (400 mg QD 4 days)   | CYP3A <sup>a</sup> | 1.79        | 1.25        | Random crossover / 11 healthy male subjects  | Monitor for signs of idelalisib toxicities with CYP3A inhibitors                                        | (FDA, 2014o) |

|                                                                                         |                                     |                    |                              |                 |                                           |                                                                                              |              |
|-----------------------------------------------------------------------------------------|-------------------------------------|--------------------|------------------------------|-----------------|-------------------------------------------|----------------------------------------------------------------------------------------------|--------------|
| Venetoclax (200 mg SD)                                                                  | Rifampin (600 mg SD)                | P-gp               | 1.78                         | 2.13            | One-sequence / 12 healthy female subjects | Avoid P-gp inhibitors; if not, reduce dose of venetoclax and monitor for signs of toxicities | (FDA, 2016e) |
| Edoxaban (60 mg SD)                                                                     | Quinidine (300 mg TID)              | P-gp               | 1.75 (AUC <sub>0-24h</sub> ) | 1.75            | N/P / healthy subjects                    | Reduce dose of edoxaban if necessary                                                         | (FDA, 2015m) |
| Edoxaban (60 mg SD)                                                                     | Cyclosporine (500 mg SD)            | P-gp, OATP1B1      | 1.73; 6.87 (M4)              | 1.74; 8.71 (M4) | N/P / healthy subjects                    | Reduce dose of edoxaban if necessary                                                         | (FDA, 2015m) |
| Trabectedin (1.3 mg/m <sup>2</sup> (alone); 0.58 mg/m <sup>2</sup> (co-administration)) | Ketoconazole (200 mg BID 15 doses)  | CYP3A <sup>a</sup> | 1.69                         | 1.21            | Random crossover / 8 patients             | Avoid CYP3A strong inhibitors                                                                | (FDA, 2015r) |
| Elbasvir (50 mg)                                                                        | Darunavir/ritonavir (600 mg/100 mg) | CYP3A <sup>a</sup> | 1.66                         | 1.67            | One-sequence / 8 healthy                  | Not recommend with certain strong CYP3A                                                      | (FDA,        |

|                                                                                      |                                  |                     |             |             |                                                                          |                                                                                                          |  |                            |
|--------------------------------------------------------------------------------------|----------------------------------|---------------------|-------------|-------------|--------------------------------------------------------------------------|----------------------------------------------------------------------------------------------------------|--|----------------------------|
| QD 7 days)                                                                           | BID 7 days)                      |                     |             |             | nonsmokers                                                               | inhibitors                                                                                               |  | 2016d)                     |
| Panobinostat (20 mg SD)                                                              | Ketoconazole (400 mg QD 5 days)  | CYP3A <sup>a</sup>  | 1.66        | 1.62        | One-sequence / 14 patients                                               | Reduce dose of panobinostat with strong CYP3A inhibitors                                                 |  | (FDA, 2015g)               |
| Vilanterol (25 µg QD 7 days inhalation administered with 200 µg fluticasone furoate) | Ketoconazole (400 mg QD 11 days) | CYP3A4 <sup>a</sup> | 1.65        | 1.22        | Random crossover, double-blind, placebo-controlled / 18 healthy subjects | Caution with strong CYP3A4 inhibitors which may cause systemic corticosteroid and cardiovascular effects |  | (FDA, 2013b); (FDA, 2013d) |
| Eliglustat (100 mg BID 18 days)                                                      | Terbinafine (250 mg QD 10 days)  | CYP2D6              | 1.64 (PBPK) | 54.5 (PBPK) | One-sequence / 10 healthy subjects (CYP2D6 IMs)                          | Reduce dose of eliglustat with moderate CYP2D6 inhibitors in CYP2D6 IMs                                  |  | (FDA, 2014c)               |
| Nintedanib (50 mg QD 14 days)                                                        | Ketoconazole (400 mg QD 11 days) | CYP3A4, P-gp        | 1.61        | 1.79        | Random crossover / 29                                                    | Risk of increased nintedanib exposure; monitor                                                           |  | (FDA, 2015f)               |

| mg SD)                                | mg QD 3 days)                            | gp                    |                                             |      | healthy  | male | for tolerability of nintedanib                                                                                                        | 2014j)          |
|---------------------------------------|------------------------------------------|-----------------------|---------------------------------------------|------|----------|------|---------------------------------------------------------------------------------------------------------------------------------------|-----------------|
|                                       |                                          |                       |                                             |      | subjects |      |                                                                                                                                       |                 |
| Venetoclax<br>(dosing regimen<br>N/P) | Ciprofloxacin<br>(dosing regimen<br>N/P) | CYP3A, P-gp           | 1.40-<br>1.60<br>(AUC <sub>0-</sub><br>24h) | N/P  | N/P      |      | Avoid moderate CYP3A inhibitors and P-gp inhibitors; if not, reduce dose of venetoclax and monitor for signs of venetoclax toxicities | (FDA,<br>2016e) |
| Venetoclax<br>(dosing regimen<br>N/P) | Diltiazem (dosing<br>regimen N/P)        | CYP3A, P-gp           | 1.40-<br>1.60<br>(AUC <sub>0-</sub><br>24h) | N/P  | N/P      |      | Avoid moderate CYP3A inhibitors and P-gp inhibitors; if not, reduce dose of venetoclax and monitor for signs of venetoclax toxicities | (FDA,<br>2016e) |
| Venetoclax<br>(dosing regimen<br>N/P) | Fluconazole<br>(dosing regimen<br>N/P)   | CYP3A                 | 1.40-<br>1.60<br>(AUC <sub>0-</sub><br>24h) | N/P  | N/P      |      | Avoid moderate CYP3A inhibitors; if not, reduce dose of venetoclax and monitor for signs of venetoclax toxicities                     | (FDA,<br>2016e) |
| Dabrafenib (75<br>mg BID 22 days)     | Ketoconazole (400<br>mg QD 4 days)       | CYP3A4 <sup>a,e</sup> | 1.57                                        | 1.26 | N/P      | / 7  | Not recommend with strong inhibitors of CYP3A4 ; if not, monitor for adverse reactions                                                | (FDA,<br>2013m) |

|                                               |                                                         |                    |                              |      |                                               |                                                                                                                                         |              |
|-----------------------------------------------|---------------------------------------------------------|--------------------|------------------------------|------|-----------------------------------------------|-----------------------------------------------------------------------------------------------------------------------------------------|--------------|
| Lesinurad (400 mg SD)                         | Fluconazole (400 mg loading dose then 200 mg QD 2 days) | CYP2C9             | 1.54                         | 1.34 | One-sequence / 12 healthy males               | Caution with moderate CYP2C9 inhibitors                                                                                                 | (FDA, 2015s) |
| Edoxaban (60 mg SD)                           | Verapamil (240 mg QD 11 days)                           | P-gp               | 1.53 (AUC <sub>0-24h</sub> ) | 1.53 | N/P / healthy subjects                        | Reduce dose of edoxaban if necessary                                                                                                    | (FDA, 2015m) |
| Afatinib (20 mg SD)                           | Ritonavir (200 mg BID 3 days)                           | P-gp               | 1.48                         | 1.39 | One-sequence / 24 healthy subjects            | Reduce dose of afatinib with P-gp inhibitors                                                                                            | (FDA, 2013f) |
| Flibanserin (25-100 mg SD)                    | Oral contraceptives (dosing regimen N/P)                | CYP3A4, CYP2C19    | 1.42                         | 1.12 | N/P / 39 healthy female subjects and patients | Caution for increased flibanserin exposures and incidence of adverse reaction with oral contraceptives and other weak CYP3A4 Inhibitors | (FDA, 2015a) |
| Panobinostat (25 mg TIW for 3 injection BIW 2 | Bortezomib (1.3 mg/m <sup>2</sup> IV injection BIW 2    | CYP3A <sup>a</sup> | 1.42                         | 1.50 | One-sequence / 7 patients                     | Reduce dose of panobinostat with strong CYP3A inhibitors                                                                                | (FDA, 2015g) |

| weeks)                   | weeks)                            |                   |      |      |                                               |                                                                                     |              |  |
|--------------------------|-----------------------------------|-------------------|------|------|-----------------------------------------------|-------------------------------------------------------------------------------------|--------------|--|
| Ospemifene (60 mg SD)    | Ketoconazole (400 mg QD 8 days)   | CYP3A, CYP2C9     | 1.41 | 1.35 | Random crossover / 12 post-menopausal females | Caution for increased risk of ospemifen-related adverse reactions with ketoconazole | (FDA, 2013k) |  |
| Edoxaban (60 mg SD)      | Amiodarone (400 mg QD 4 days)     | P-gp              | 1.40 | 1.60 | N/P                                           | Reduce dose of edoxaban if necessary                                                | (FDA, 2015m) |  |
| Dasabuvir (250 mg SD)    | Ketoconazole (400 mg QD 6 days)   | P-gp <sup>f</sup> | 1.40 | 1.16 | One-sequence / 12 healthy subjects            | Caution for increased plasma concentrations of dasabuvir with P-gp inhibitors       | (FDA, 2014m) |  |
| Paritaprevir (150 mg SD) | Gemfibrozil (600 mg BID 5 days)   | OATP1B1/3         | 1.35 | 1.29 | One-sequence / 11 healthy subjects            | Risk of increased plasma concentrations of paritaprevir with OATP1B1/3 inhibitors   | (FDA, 2014m) |  |
| Flibanserin (100 mg SD)  | Grapefruit juice (240 mL regular) | CYP3A4, CYP2C19   | 1.34 | 1.07 | One-sequence / 26 healthy                     | Contraindicate with CYP3A4 moderate inhibitors                                      | (FDA, 2015a) |  |

strength SD)

females

---

Drugs were orally administered unless specified; either CYP3A or CYP3A4 depending on how the enzyme is presented in the NDA reviews.

BID, twice daily; EM, extensive metabolizer; IM, intermediate metabolizer; IV, intravenously; N/P – not provided; PM, poor metabolizer; QD, once daily; QID, four times daily; SD, single dose; TID, three times daily; TIW, three times a week; UM, ultrarapid metabolizer

<sup>a</sup> – Also a substrate of P-gp based on in vitro results; inhibition of P-gp might contribute to the observed interaction

<sup>b</sup> – Also a substrate of P-gp and BCRP based on in vitro results

<sup>c</sup> – Also metabolized by CYP3A4, CYP2C9, and CYP2C19; fluvoxamine inhibits these P450s

<sup>d</sup> – Also metabolized by CYP2J2; ketoconazole inhibits CYP2J2 in vitro

<sup>e</sup> – Mainly metabolized by CYP2C8, with contributions from CYP3A4 and other P450s; ketoconazole is a weak inhibitor of CYP2C8 in vivo

<sup>f</sup> – Dasabuvir is a sensitive substrate of CYP2C8; ketoconazole weakly inhibits CYP2C8 in vivo





Supplemental Table 4. Induction DDIs, NME as substrate

| Victim Drug<br>(Dose)               | Inducer (Dose)                      | Main Enzymes<br>/Transporters<br>Possibly<br>Involved | AUC<br>Ratio | C <sub>max</sub><br>Ratio | Study Design /<br>Population                   | Labeling Impact                            | Reference    |
|-------------------------------------|-------------------------------------|-------------------------------------------------------|--------------|---------------------------|------------------------------------------------|--------------------------------------------|--------------|
| <i>AUC ratios</i> ≤ 0.2             |                                     |                                                       |              |                           |                                                |                                            |              |
| Isavuconazonium sulfate (200 mg QD) | Rifampin (600 mg QD )               | CYP3A, butyrylcholine sterase                         | 0.03         | 0.25                      | N/P                                            | Contraindicate with strong CYP3A4 inducers | (FDA, 2015e) |
| Eliglustat (100 mg BID 6 days)      | Rifampin (600 mg QD IV dose 6 days) | CYP3A <sup>a</sup>                                    | 0.04         | 0.05                      | One-sequence / 6 healthy subjects (CYP2D6 PMs) | Not recommend with strong CYP3A inducers   | (FDA, 2014c) |
| Flibanserin (100 mg SD)             | Rifampin (600 mg QD 9 days)         | CYP3A4, CYP2C19                                       | 0.04         | 0.10                      | Random crossover / 23 healthy                  | Not recommend with CYP3A4 inducers         | (FDA, 2015a) |

---

females

|                                |                                     |                     |                |                |                                                    |                                           |              |
|--------------------------------|-------------------------------------|---------------------|----------------|----------------|----------------------------------------------------|-------------------------------------------|--------------|
| Ibrutinib (dosing regimen N/P) | Rifampin (dosing regimen N/P)       | CYP3A <sup>a</sup>  | 0.08<br>(PBPK) | 0.07<br>(PBPK) | N/P                                                | Avoid strong CYP3A inducers               | (FDA, 2013g) |
| Eliglustat (150 mg BID 6 days) | Rifampin (600 mg QD IV dose 6 days) | CYP3A <sup>a</sup>  | 0.09           | 0.09           | One-sequence / 2 healthy subjects<br>(CYP2D6 IMs)  | Not recommend with strong CYP3A inducers  | (FDA, 2014c) |
| Eliglustat (150 mg BID 6 days) | Rifampin (600 mg QD IV dose 6 days) | CYP3A <sup>a</sup>  | 0.10           | 0.11           | One-sequence / 12 healthy subjects<br>(CYP2D6 EMs) | Not recommend with strong CYP3A inducers  | (FDA, 2014c) |
| Naloxegol (25 mg SD)           | Rifampin (600 mg QD 10 days)        | CYP3A4 <sup>a</sup> | 0.11           | 0.26           | One-sequence / 22 healthy subjects                 | Not recommend with strong CYP3A4 inducers | (FDA, 2014h) |

|                         |                              |                       |      |      |                                                       |                                                                                  |              |
|-------------------------|------------------------------|-----------------------|------|------|-------------------------------------------------------|----------------------------------------------------------------------------------|--------------|
| Olaparib (300 mg SD)    | Rifampin (600 mg QD 13 days) | CYP3A <sup>a</sup>    | 0.11 | 0.3  | One-sequence / 17 patients with advanced solid tumors | Avoid strong and moderate CYP3A inducers; if not, caution for decreased efficacy | (FDA, 2014g) |
| Rolapitant (200 mg SD)  | Rifampin (600 mg QD14 days)  | CYP3A4                | 0.12 | 0.68 | One-sequence / 20 healthy subjects                    | Avoid CYP3A4 strong inducers                                                     | (FDA, 2015o) |
| Suvorexant (40 mg SD)   | Rifampin (600 mg QD 17 days) | CYP3A                 | 0.12 | 0.36 | One-sequence / 10 healthy subjects                    | Caution for reduced efficacy with strong CYP3A inducers                          | (FDA, 2014b) |
| Tasimelteon (20 mg SD)  | Rifampin (600 mg QD 11 days) | CYP3A4 <sup>a,b</sup> | 0.14 | 0.23 | One-sequence / 24 healthy subjects                    | Avoid strong CYP3A4 inducers                                                     | (FDA, 2014f) |
| Palbociclib (125 mg SD) | Rifampin (600 mg QD 12 days) | CYP3A <sup>a</sup>    | 0.15 | 0.28 | One-sequence / 14 healthy subjects                    | Avoid moderate and strong CYP3A inducers                                         | (FDA, 2015h) |

|                                |                               |                                   |             |             |                                               |                                                                                                     |              |
|--------------------------------|-------------------------------|-----------------------------------|-------------|-------------|-----------------------------------------------|-----------------------------------------------------------------------------------------------------|--------------|
| Cobimetinib (60 mg SD)         | Rifampin (600 mg QD)          | CYP3A <sup>a</sup>                | 0.17 (PBPK) | 0.37 (PBPK) | PBPK modeling/simulations of healthy subjects | Avoid CYP3A strong inducers                                                                         | (FDA, 2015d) |
| Grazoprevir (200 mg QD 7 days) | Efavirenz (600 mg QD 21 days) | CYP3A <sup>c</sup>                | 0.17        | 0.13        | One-sequence / 11 healthy nonsmokers          | Contraindicate with strong CYP3A inducers and efavirenz; not recommend with moderate CYP3A inducers | (FDA, 2016d) |
| Velpatasvir (100 mg SD)        | Rifampin (600 mg QD 8 days)   | CYP2B6, CYP2C8, CYP3A, P-gp, BCRP | 0.19        | 0.29        | Random crossover / 12 healthy subjects        | Not recommend with P-gp inducers and/or moderate to strong CYP inducers                             | (FDA, 2016b) |
| Netupitant (300 mg SD)         | Rifampin (600 mg QD 17 days)  | CYP3A4                            | 0.20        | 0.45        | Random crossover / 18 healthy subjects        | Avoid strong CYP3A4 inducers                                                                        | (FDA, 2014a) |

---

$0.2 < AUC \text{ ratios} \leq 0.5$

|                                                  |                              |                    |      |                          |                                       |                                                           |              |
|--------------------------------------------------|------------------------------|--------------------|------|--------------------------|---------------------------------------|-----------------------------------------------------------|--------------|
| Daclatasvir (60 mg SD)                           | Rifampin (600 mg QD 9 days)  | CYP3A <sup>a</sup> | 0.21 | 0.44                     | One-sequence / 14 healthy Asian Males | Contraindicate with strong CYP3A inducers                 | (FDA, 2015f) |
| Macitentan (30 mg SD on day 1, 10 mg QD 12 days) | Rifampin (600 mg QD 7 days)  | CYP3A4             | 0.21 | 0.07 (C <sub>min</sub> ) | One sequence / healthy male subjects  | Avoid strong CYP3A4 inducers                              | (FDA, 2013j) |
| Brexpiprazole (4 mg SD)                          | Rifampin (600 mg QD 13 days) | CYP3A <sup>a</sup> | 0.24 | 0.69                     | One-sequence / 16 healthy subjects    | Increase dose of brexpiprazole with CYP3A strong inducers | (FDA, 2015l) |
| Idelalisib (150 mg SD)                           | Rifampin (600 mg QD 8 days)  | CYP3A, P-gp        | 0.24 | 0.43                     | One-sequence / 11 healthy subjects    | Avoid strong CYP3A and P-gp inducers                      | (FDA, 2014o) |
| Ixazomib citrate (4 mg SD)                       | Rifampin (600 mg QD14 days)  | CYP3A <sup>a</sup> | 0.26 | 0.46                     | Parallel / 16 patients                | Avoid CYP3A strong inducers                               | (FDA, 2015i) |

|                                |                                   |                     |                       |                       |                                               |                                                                               |              |
|--------------------------------|-----------------------------------|---------------------|-----------------------|-----------------------|-----------------------------------------------|-------------------------------------------------------------------------------|--------------|
| Alectinib (600 mg SD)          | Rifampin (600 mg QD 13 days)      | CYP3A4 <sup>a</sup> | 0.27;<br>1.79<br>(M4) | 0.49;<br>2.20<br>(M4) | One-sequence / 24 healthy subjects            | None                                                                          | (FDA, 2015b) |
| Cobimetinib (60 mg QD 21 days) | Efavirenz (600 mg QD 21 days)     | CYP3A4 <sup>a</sup> | 0.27<br>(PBPK)        | 0.29<br>(PBPK)        | PBPK modeling/simulations of healthy subjects | Avoid CYP3A moderate inducers                                                 | (FDA, 2015d) |
| Vortioxetine (20 mg SD)        | Rifampin (600 mg QD 11 days)      | CYP3A <sup>d</sup>  | 0.27                  | 0.49                  | One-sequence / 14 healthy subjects            | Increase dose of vortioxetine with a strong CYP inducer for more than 14 days | (FDA, 2013e) |
| Apremilast (30 mg SD)          | Rifampin (600 mg QD 15 days)      | CYP3A4 <sup>e</sup> | 0.28                  | 0.57                  | One-sequence / 21 healthy subjects            | Not recommend with strong CYP inducers                                        | (FDA, 2014l) |
| Sofosbuvir (400 mg SD)         | Rifampin (600 mg QD duration N/P) | P-gp                | 0.28                  | 0.23                  | N/P / 17 healthy                              | Not recommend with P-gp inducers                                              | (FDA, 2016b) |

|                                |                               |                     |      |      | subjects                                  |                                                                                                    |              |
|--------------------------------|-------------------------------|---------------------|------|------|-------------------------------------------|----------------------------------------------------------------------------------------------------|--------------|
| Sonidegib (800 mg SD)          | Rifampin (600 mg QD 14 days)  | CYP3A               | 0.28 | 0.46 | Parallel / 16 healthy subjects            | Avoid CYP3A strong inducers                                                                        | (FDA, 2015j) |
| Simeprevir (150 mg QD 14 days) | Efavirenz (600 mg QD 14 days) | CYP3A <sup>a</sup>  | 0.29 | 0.48 | Random crossover / 23 healthy subjects    | Not recommend with moderate inducers of CYP3A                                                      | (FDA, 2013i) |
| Venetoclax (200 mg SD)         | Rifampin (600 mg QD 13 days)  | CYP3A, P-gp         | 0.29 | 0.60 | One-sequence / 12 healthy female subjects | Avoid with strong and moderate CYP3A inducers, and consider alternatives with less CYP3A induction | (FDA, 2016e) |
| Ceritinib (750 mg SD)          | Rifampin (600 mg QD 14 days)  | CYP3A               | 0.30 | 0.56 | One-sequence / 19 healthy subjects        | Avoid strong CYP3A inducers; if not, adjust dose of ceritinib                                      | (FDA, 2014p) |
| Dasabuvir (250 mg SD)          | Carbamazepine                 | CYP2C8 <sup>a</sup> | 0.30 | 0.46 | One-sequence                              | Contraindicate with strong inducers of CYP2C8                                                      | (FDA, 2014q) |



|                                        |                                                    |                    |             |             |                                         |                                                                                                                                   |              |
|----------------------------------------|----------------------------------------------------|--------------------|-------------|-------------|-----------------------------------------|-----------------------------------------------------------------------------------------------------------------------------------|--------------|
| mg SD)                                 | (200 mg QD 3 days, then BID 21 days)               |                    |             |             | / 12 healthy subjects                   |                                                                                                                                   | 2014m)       |
| Dolutegravir (50 mg QD 19 days)        | Etravirine (200 mg BID 14 days)                    | CYP3A, UGT         | 0.30        | 0.48        | One-sequence / 15 healthy male subjects | Should not be used with etravirine without co-administration of atazanavir/ritonavir, darunavir/ritonavir, or lopinavir/ritonavir | (FDA, 2013n) |
| Paritaprevir (150 mg SD)               | Carbamazepine (200 mg QD 3 days, then BID 21 days) | CYP3A <sup>a</sup> | 0.30        | 0.44        | One-sequence / 12 healthy subjects      | Contraindicate with strong inducers of CYP3A                                                                                      | (FDA, 2014m) |
| Sonidegib (200 mg QD for steady state) | Efavirenz (600 mg QD 120 days)                     | CYP3A              | 0.31 (PBPK) | 0.4 (PBPK)  | PBPK modeling/simulations of patients   | Avoid CYP3A moderate inducers                                                                                                     | (FDA, 2015j) |
| Panobinostat (20 mg SD)                | Rifampin (600 mg QD 14 days)                       | CYP3A <sup>a</sup> | 0.35 (PBPK) | 0.43 (PBPK) | PBPK modeling/simulations of 10         | Avoid strong CYP3A inducers                                                                                                       | (FDA, 2015g) |

|                                 |                                     |                     |             |      | trials of 10                                              |                                                                                                     |              |
|---------------------------------|-------------------------------------|---------------------|-------------|------|-----------------------------------------------------------|-----------------------------------------------------------------------------------------------------|--------------|
|                                 |                                     |                     |             |      | healthysubject                                            |                                                                                                     |              |
|                                 |                                     |                     |             |      | s                                                         |                                                                                                     |              |
| Dabrafenib (150 mg BID 21 days) | Phenytoin (300 mg BID duration N/P) | CYP3A <sup>a</sup>  | 0.38        | 0.23 | One-sequence / 8 pateints alone, 1 patient with pheyntoin | Not recommend with strong inducers of CYP3A4; if not, monitor patients closely for loss of efficacy | (FDA, 2013m) |
| Eliglustat (150 mg BID 6 days)  | Rifampin (600 mg QD IV dose 6 days) | CYP3A <sup>a</sup>  | 0.38        | 0.40 | One-sequence / 5 healthy subjects (CYP2D6 UMs)            | Not recommend with strong inducers of CYP3A                                                         | (FDA, 2014c) |
| Ibrutinib (dosing regimen N/P)  | Efavirenz (dosing regimen N/P)      | CYP3A               | 0.38 (PBPK) | N/P  | N/P                                                       | None                                                                                                | (FDA, 2013g) |
| Ivabradine (dosing regimen)     | St. John's Wort extract (dosing     | CYP3A4 <sup>a</sup> | 0.40        | 0.50 | N/P                                                       | Avoid CYP3A4 inducers                                                                               | (FDA,        |

| N/P)                            | regimen N/P)                                         |                        |                     |                     |                                              |                                                                                                          | 2015c)       |
|---------------------------------|------------------------------------------------------|------------------------|---------------------|---------------------|----------------------------------------------|----------------------------------------------------------------------------------------------------------|--------------|
| Ledipasvir (90 mg SD)           | Rifampin (600 mg QD 7 days)                          | P-gp                   | 0.40                | 0.69                | One-sequence / 31 healthy subjects           | Not recommend with P-gp inducers                                                                         | (FDA, 2014e) |
| Olaparib (300 mg SD)            | Efavirenz (400 mg QD 13 days)                        | CYP3A <sup>a</sup>     | 0.40-0.50<br>(PBPK) | 0.69-0.78<br>(PBPK) | Crossover / 100 subjects                     | Avoid moderate CYP3A inducers; if not, caution for decreased efficacy                                    | (FDA, 2014g) |
| Dolutegravir (50 mg QD 10 days) | Tipranavir and ritonavir (500 mg /200 mg BID 5 days) | CYP3A, UGT             | 0.41                | 0.53                | One-sequence / 14 healthy subjects           | Increase dosing interval of dolutegravir                                                                 | (FDA, 2013n) |
| Ospemifene (60 mg SD)           | Rifampin (600 mg QD 5 days)                          | CYP3A, CYP2C9, CYP2C19 | 0.41                | 0.47                | Random crossover / 12 post-menopausal female | Caution for decreased clinical effect of ospemifene with drugs that induce CYP3A4, CYP2C9 and/or CYP2C19 | (FDA, 2013k) |

|                                        |                               |                    |             |             | subjects                                |                                                                                                     |              |
|----------------------------------------|-------------------------------|--------------------|-------------|-------------|-----------------------------------------|-----------------------------------------------------------------------------------------------------|--------------|
| Dolutegravir (50 mg QD 19 days)        | Efavirenz (600 mg QD 14 days) | CYP3A, UGT         | 0.43        | 0.61        | One-sequence / 12 healthy male subjects | Increase dosing interval of dolutegravir                                                            | (FDA, 2013n) |
| Sonidegib (200 mg QD for steady state) | Efavirenz (600 mg QD 14 days) | CYP3A              | 0.44 (PBPK) | 0.51 (PBPK) | PBPK modeling/simulations of patients   | Avoid moderate CYP3A inducers                                                                       | (FDA, 2015j) |
| Dolutegravir (50 mg BID 21 days)       | Rifampin (600 mg QD 14 days)  | CYP3A, UGT         | 0.46        | 0.56        | One-sequence / 12 healthy subjects      | Increase dosing interval of dolutegravir                                                            | (FDA, 2013n) |
| Elbasvir (50 mg QD 8 days)             | Efavirenz (600 mg QD 22 days) | CYP3A <sup>a</sup> | 0.46        | 0.55        | One-sequence / 7 healthy nonsmokers     | Contraindicate with strong CYP3A inducers and efavirenz; not recommend with moderate CYP3A inducers | (FDA, 2016f) |
| Vorapaxar (20 mg loading dose,         | Rifampin (600 mg QD 28 days)  | CYP3A              | 0.46        | 0.61        | Parallel, placebo-                      | Not recommend with strong inducers of CYP3A                                                         | (FDA, 2014n) |

|                                 |                                                                          |                            |      |      |                                                            |                                                                      |              |
|---------------------------------|--------------------------------------------------------------------------|----------------------------|------|------|------------------------------------------------------------|----------------------------------------------------------------------|--------------|
| 2.5 mg QD 22 days)              |                                                                          |                            |      |      | controlled / 12 healthy subjects                           |                                                                      |              |
| Velpatasvir (100 mg QD 28 days) | Efavirenz and emtricitabine and tenofovir DF (600/200/300 mg QD 14 days) | CYP2B6, CYP3A4, P-gp, BCRP | 0.47 | 0.53 | One-sequence / 14 healthy volunteers                       | Not recommend with moderate to potent CYP inducers and P-gp inducers | (FDA, 2016b) |
| Canagliflozin (300 mg SD)       | Rifampin (600 mg QD 8 days)                                              | UGT2B4, UGT1A9             | 0.49 | 0.72 | Not provided / healthy subjects                            | Increase dose of canagliflozin with UGT inducers                     | (FDA, 2013h) |
| Pirfenidone (801 mg SD)         | Cigarette smoking (dosing regimen N/P)                                   | CYP1A2                     | 0.49 | 0.71 | Parallel / healthy subjects (26 smokers and 25 nonsmokers) | Reduce dose of pirfenidone with strong or moderate CYP1A2 inhibitors | (FDA, 2014d) |

|                                                           |                                                           |                                        |             |                          |                                                |                                                        |              |
|-----------------------------------------------------------|-----------------------------------------------------------|----------------------------------------|-------------|--------------------------|------------------------------------------------|--------------------------------------------------------|--------------|
| Naloxegol (25 mg SD)                                      | Efavirenz (dosing regimen N/P)                            | CYP3A4 <sup>a</sup>                    | 0.50 (PBPK) | N/P                      | PBPK modeling/simulations of patients          | None                                                   | (FDA, 2014h) |
| Nintedanib (150 mg SD)                                    | Rifampin (600 mg QD 7 days)                               | CYP3A4, P-gp                           | 0.50        | 0.60                     | One-sequence / 25 healthy males                | Avoid CYP3A4 and P-gp inducers                         | (FDA, 2014j) |
| <i>0.5 &lt; AUC ratios ≤ 0.8 with dose recommendation</i> |                                                           |                                        |             |                          |                                                |                                                        |              |
| Simeprevir (200 mg QD 7 days)                             | Rifampin (600 mg QD 7 days)                               | CYP3A <sup>a</sup> , OATP (inhibition) | 0.52        | 0.08 (C <sub>min</sub> ) | Random crossover / 17 healthy subjects         | Not recommend with strong inducers of CYP3A            | (FDA, 2013i) |
| Tasimelteon (20 mg SD)                                    | Cigarette smoking (minimum of 10 tobacco cigarettes/day 6 | CYP1A2                                 | 0.53        | 0.57                     | Parallel / healthy subjects (24 smokers and 24 | Caution for reduced efficacy of tasimelteon in smokers | (FDA, 2014f) |

|                                                     | months)                          |                    |      |      | nonsmokers)                                            |                                                                             |                 |
|-----------------------------------------------------|----------------------------------|--------------------|------|------|--------------------------------------------------------|-----------------------------------------------------------------------------|-----------------|
| Brivaracetam<br>(150 mg SD)                         | Rifampin (600 mg<br>QD 8 days)   | CYP2C19            | 0.55 | 0.89 | Random<br>crossover / 26<br>healthy male<br>nonsmokers | Increase dose of brivaracetam with rifampin                                 | (FDA,<br>2016a) |
| Trabectedin (1.3<br>mg/m2 SD )                      | Rifampin (600 mg<br>QD 6 days)   | CYP3A <sup>a</sup> | 0.55 | 0.77 | Random<br>crossover / 8<br>patients                    | Avoid CYP3A strong inducers                                                 | (FDA,<br>2015r) |
| Edoxaban (60 mg<br>SD)                              | Rifampin (600 mg<br>QD 7 days)   | P-gp               | 0.60 | 1.00 | N/P                                                    | Avoid rifampin                                                              | (FDA,<br>2015m) |
| Lesinurad (400<br>mg SD)                            | Rifampin (600 mg<br>QD 14 days)  | CYP2C9             | 0.62 | 0.76 | One-sequence<br>/ 14 healthy<br>males                  | Monitor for potential reduction in efficacy with<br>moderate CYP2C9 inducer | (FDA,<br>2015s) |
| Daclatasvir (60<br>mg QD 14 days<br>and 120 mg QD 5 | Efavirenz (600 mg<br>QD 14 days) | CYP3A <sup>a</sup> | 0.68 | 0.83 | One-<br>sequence/17<br>healthy                         | Increase dose of daclatasvir with CYP3A<br>moderate inducers                | (FDA,<br>2015f) |

| days)                                                          |                                                                             |                     |      | subjects |                                                |                                                                                       |              |
|----------------------------------------------------------------|-----------------------------------------------------------------------------|---------------------|------|----------|------------------------------------------------|---------------------------------------------------------------------------------------|--------------|
| Afatinib (40 mg SD)                                            | Rifampin (600 mg BID 7 days)                                                | P-gp                | 0.66 | 0.78     | One-sequence / 22 healthy subjects             | Increase dose of afatinib with chronic P-gp inducers                                  | (FDA, 2013f) |
| Eslicarbazepine (800 mg as eslicarbazepine acetate QD 35 days) | Carbamazepine (200 mg QD 7 days, 400 mg QD 7 days, then 400 mg BID 14 days) | Unidentified enzyme | 0.68 | 0.78     | One-sequence / 18 healthy subjects             | Adjust dose for eslicarbazepine or carbamazepine as needed                            | (FDA, 2013c) |
| Eslicarbazepine (600 mg QD first 2 days, 1200 mg QD 27 days)   | Phenytoin (100 mg QD first 2 days, 300 mg QD 19 days)                       | Unidentified enzyme | 0.68 | 0.69     | One-sequence / 15 healthy male subjects        | Increase dose of eslicarbazepine if necessary and adjust dose for phenytoin as needed | (FDA, 2013c) |
| Nintedanib (150 mg BID 28 days)                                | Pirfenidone (600 mg TID 28 days)                                            | CYP3A4 <sup>a</sup> | 0.69 | 0.59     | Double-Blind, parallel, placebo-controlled / 9 | Avoid CYP3A4 inducers                                                                 | (FDA, 2014j) |



|                                 |                                      |                 |                       |      | patients)                       |                                                                                                  |              |
|---------------------------------|--------------------------------------|-----------------|-----------------------|------|---------------------------------|--------------------------------------------------------------------------------------------------|--------------|
| Flibanserin (100 mg SD)         | Etravirine (200 mg BID 15 days)      | CYP3A4, CYP2C19 | 0.75                  | 0.97 | One-sequence/24 healthy females | Not recommend with CYP3A4 inducers                                                               | (FDA, 2015a) |
| Nintedanib (dosing regimen N/P) | Cigarette smoke (dosing regimen N/P) | Unclear         | 0.79 (smokers, PopPK) | N/P  | N/P                             | Recommend patients to stop smoking prior to treatment and to avoid smoking when using nintedanib | (FDA, 2014j) |

Drugs were orally administered unless specified; either CYP3A or CYP3A4 depending on how the enzyme is presented in the NDA reviews.

BID, twice daily; EM, extensive metabolizer; IM, intermediate metabolizer; IV, intravenously; N/P – not provided; PM, poor metabolizer; QD, once daily; SD, single dose; TID, three times daily; UM, ultrarapid metabolizer

<sup>a</sup> – Also a substrate of P-gp based on in vitro results; induction of P-gp might contribute to the observed interaction

<sup>b</sup> – Also metabolized by CYP1A2, CYP2C9, and CYP2C19; rifampin is an inducer of multiple P450s

<sup>c</sup> – Also a substrate of P-gp and BCRP based on in vitro results; induction of P-gp and BCRP might contribute to the observed interaction

<sup>d</sup> – Also metabolized by CYP2D6, CYP2C9, CYP2C19, and CYP2A6

<sup>e</sup> – Also metabolized by CYP1A2 and CYP2A6

<sup>f</sup> – Also metabolized by CYP2C9 and CYP3A

Supplemental Table 5. Inhibition DDIs, NME as inhibitor

| Victim Drug<br>(Dose)       | Inhibitor (Dose)                                                                                                | Main Enzymes<br>/ Transporters<br>Possibly<br>Involved | AUC<br>Ratio | C <sub>max</sub><br>Ratio | Study Design /<br>Population       | Labeling Impact                                                            | Reference    |
|-----------------------------|-----------------------------------------------------------------------------------------------------------------|--------------------------------------------------------|--------------|---------------------------|------------------------------------|----------------------------------------------------------------------------|--------------|
| <i>AUC ratios</i> ≥         |                                                                                                                 |                                                        |              |                           |                                    |                                                                            |              |
| 5                           |                                                                                                                 |                                                        |              |                           |                                    |                                                                            |              |
| Tacrolimus (2 mg-0.5 mg SD) | Ombitasvir, paritaprevir, and ritonavir (paritaprevir/ritonavir 150 mg/100 mg QD + ombitasvir 25 mg QD 28 days) | CYP3A, P-gp                                            | 85.92        | 24.54 (C <sub>min</sub> ) | One-sequence / 12 healthy subjects | Contraindicate with drugs that are highly dependent on CYP3A for clearance | (FDA, 2014m) |
| Tacrolimus (2 mg-0.5 mg SD) | paritaprevir, dasabuvir, and                                                                                    | CYP3A, P-gp                                            | 78.68        | 24.88 (C <sub>min</sub> ) | One-sequence / 12 healthy          | Contraindicate with drugs that are highly dependent on CYP3A for clearance | (FDA, 2014m) |

ritonavir  
(paritaprevir/ritonavir 150 mg/100 mg QD + dasabuvir 400 mg BID 28 days)

subjects

Tacrolimus (2 mg-0.5 mg SD)

Ombitasvir, paritaprevir, dasabuvir, and ritonavir (paritaprevir/ritonavir 150 mg/100 mg QD + ombitasvir 25 mg QD + dasabuvir 400 mg BID 28 days)

CYP3A, P-gp

57.07

16.48 (C<sub>min</sub>)

One-sequence / 12 healthy subjects

Contraindicate with drugs that are highly dependent on CYP3A for clearance

(FDA, 2014m)

|                                                          |                                                                                                                                                   |             |      |                     |                                    |                                                                                                        |              |
|----------------------------------------------------------|---------------------------------------------------------------------------------------------------------------------------------------------------|-------------|------|---------------------|------------------------------------|--------------------------------------------------------------------------------------------------------|--------------|
| Cyclosporine (100 mg SD alone, 10 mg SD with inhibitors) | Ombitasvir, paritaprevir, dasabuvir, and ritonavir (paritaprevir/ritonavir 150 mg/100 mg QD + ombitasvir 25 mg QD + dasabuvir 400 mg BID 21 days) | CYP3A, P-gp | 5.78 | 15.73 ( $C_{min}$ ) | One-sequence / 12 healthy subjects | Reduce dose of cyclosporine and frequently assess renal function and cyclosporine-related side effects | (FDA, 2014m) |
| Midazolam (5 mg SD)                                      | Idelalisib (150 mg BID 8 days)                                                                                                                    | CYP3A       | 5.15 | 2.31                | One-sequence / 11 healthy subjects | Avoid with CYP3A substrates                                                                            | (FDA, 2014o) |
| $2 \leq AUC$<br>ratios < 5                               |                                                                                                                                                   |             |      |                     |                                    |                                                                                                        |              |
| Cyclosporine                                             | Paritaprevir,                                                                                                                                     | CYP3A, P-gp | 4.48 | 13.33               | One-sequence                       | Reduce dose of cyclosporine; assess renal                                                              | (FDA,        |

|                                                                    |                                                                                                                                |             |      |                             |                                          |                                                                                             |                 |
|--------------------------------------------------------------------|--------------------------------------------------------------------------------------------------------------------------------|-------------|------|-----------------------------|------------------------------------------|---------------------------------------------------------------------------------------------|-----------------|
| (100 mg (tablet)<br>- 10 mg<br>(suspension)<br>SD)                 | dasabuvir, and<br>ritonavir<br>(paritaprevir/ritonavir 150 mg/100 mg QD +<br>dasabuvir 400 mg<br>BID 21 days)                  |             |      | (C <sub>min</sub> )         | / 12 healthy<br>subjects                 | function and cyclosporine-related side effects                                              | 2014m)          |
| Cyclosporine<br>(100 mg (tablet)<br>- 10 mg<br>(suspension)<br>SD) | Ombitasvir,<br>paritaprevir, and<br>ritonavir<br>(paritaprevir/ritonavir 150 mg/100 mg QD +<br>ombitasvir 25 mg<br>QD 21 days) | CYP3A, P-gp | 4.28 | 12.5<br>(C <sub>min</sub> ) | One-sequence<br>/ 12 healthy<br>subjects | Reduce dose of cyclosporine; assess renal<br>function and cyclosporine-related side effects | (FDA,<br>2014m) |
| Rilpivirine (25<br>mg QD 28                                        | Ombitasvir,<br>paritaprevir,                                                                                                   | CYP3A       | 3.40 | 1.00                        | One-sequence<br>/ 10 healthy             | Not recommend for co-administration                                                         | (FDA,<br>2014m) |

|                                |                                                                                                                               |        |      |      |                                                 |                                                          |              |
|--------------------------------|-------------------------------------------------------------------------------------------------------------------------------|--------|------|------|-------------------------------------------------|----------------------------------------------------------|--------------|
| days)                          | dasabuvir, and<br>ritonavir<br>(paritaprevir/ritonavir 150 mg/100 mg QD + ombitasvir 25 mg QD + dasabuvir 400 mg BID 14 days) |        |      |      | subjects                                        |                                                          |              |
| Dextromethorphan (30 mg SD)    | Rolapitant (200 mg SD)                                                                                                        | CYP2D6 | 3.33 | 2.77 | One-sequence / 26 subjects (CYP2D6 EMs and IMs) | Monitor for adverse reactions with NTR CYP2D6 substrates | (FDA, 2015o) |
| Rilpivirine (25 mg QD 28 days) | Ombitasvir, paritaprevir, dasabuvir, and ritonavir                                                                            | CYP3A  | 3.27 | 2.55 | One-sequence / 8 healthy subjects               | Not recommend for co-administration                      | (FDA, 2014m) |

(paritaprevir/ritonavir 150 mg/100 mg QD + ombitasvir 25 mg QD + dasabuvir 400 mg BID 14 days)

|                                |                                       |                 |                            |      |                                               |                                     |              |
|--------------------------------|---------------------------------------|-----------------|----------------------------|------|-----------------------------------------------|-------------------------------------|--------------|
| Sofosbuvir (10 mg SD)          | Simeprevir (150 mg QD 12 or 24 weeks) | P-gp            | 3.16                       | 1.91 | N/P / 22                                      | None                                | (FDA, 2013i) |
| Atorvastatin (20 mg SD)        | Grazoprevir (200 mg QD 8 days)        | BCRP, OATP1B1/3 | 3.00                       | 5.67 | One-sequence / 9 healthy caucasian nonsmokers | Reduce dose of atorvastatin         | (FDA, 2016d) |
| Simeprevir (150 mg QD 10 days) | Ledipasvir (30 mg QD 10 days)         | P-gp            | 2.84 (AUC <sub>tau</sub> ) | 2.56 | Random crossover / 28 healthy                 | Not recommend for co-administration | (FDA, 2014e) |

|                                     |                                                                                                                                                                                   |             |                              |                            | subjects                                 |                                                                      |                 |
|-------------------------------------|-----------------------------------------------------------------------------------------------------------------------------------------------------------------------------------|-------------|------------------------------|----------------------------|------------------------------------------|----------------------------------------------------------------------|-----------------|
| Rosuvastatin<br>(10 mg SD)          | Simeprevir (150<br>mg QD 7 days)                                                                                                                                                  | OATP1B1/3   | 2.81                         | 3.17                       | N/P/ 16                                  | Reduce and titrate the statin dose; monitor for<br>adverse reactions | (FDA,<br>2013i) |
| Ritonavir (100<br>mg QD 28<br>days) | Ombitasvir,<br>paritaprevir,<br>dasabuvir, and<br>ritonavir<br>(paritaprevir/ritona<br>vir 150 mg /100<br>mg QD +<br>ombitasvir 25 mg<br>QD + dasabuvir<br>250 mg BID 14<br>days) | CYP3A, P-gp | 2.78                         | 2.54                       | One-sequence<br>/ 12 healthy<br>subjects | None                                                                 | (FDA,<br>2014m) |
| Dexamethasone<br>(20 mg on Day      | Netupitant (450                                                                                                                                                                   | CYP3A       | 2.76<br>(AUC <sub>84</sub> - | 1.89<br>(C <sub>max8</sub> | Random<br>crossover / 30                 | Reduce dose of dexamethasone                                         | (FDA,           |



|                                    |                                                                                                                                                   |                 |                                          |                                          |                                  |                             |              |
|------------------------------------|---------------------------------------------------------------------------------------------------------------------------------------------------|-----------------|------------------------------------------|------------------------------------------|----------------------------------|-----------------------------|--------------|
| 1 followed by 8 mg BID on Day 2-4) | mg SD)                                                                                                                                            |                 | 108h)                                    | 4-108h)                                  | healthy subjects                 |                             | 2014a)       |
| Norgestimate (250 µg QD 21 days)   | Ombitasvir, paritaprevir, dasabuvir, and ritonavir (paritaprevir/ritonavir 150 mg/100 mg QD + ombitasvir 25 mg QD + dasabuvir 250 mg BID 19 days) | CYP3A, UGT1A1   | 2.75 (norelgestromin), 2.64 (norgestrel) | 2.30 (norelgestromin); 2.46 (norgestrel) | One-sequence / 3 healthy females | None <sup>a</sup>           | (FDA, 2014m) |
| Rosuvastatin (10 mg SD)            | Velpatasvir (100 mg QD 11 days)                                                                                                                   | BCRP, OATP1B1/3 | 2.69                                     | 2.61                                     | Random crossover / 18 healthy    | Reduce dose of rosuvastatin | (FDA, 2016b) |

| Ritonavir (100 mg BID 28 days)                               | Paritaprevir, dasabuvir, and ritonavir (paritaprevir/ritonavir 150 mg/100 mg QD + dasabuvir 400 mg BID 14 days) | CYP3A, P-gp       | 2.66                          | 2.34                            | One-sequence / 12 healthy subjects     | None                         | (FDA, 2014m) |
|--------------------------------------------------------------|-----------------------------------------------------------------------------------------------------------------|-------------------|-------------------------------|---------------------------------|----------------------------------------|------------------------------|--------------|
| dexamethasone (20 mg on Day 1 followed by 8 mg BID on Day 2) | Netupitant (450 mg SD)                                                                                          | CYP3A             | 2.64 (AUC <sub>24-36h</sub> ) | 1.89 (C <sub>max2-4-36h</sub> ) | Random crossover / 30 healthy subjects | Reduce dose of dexamethasone | (FDA, 2014a) |
| Rosuvastatin (5 mg QD 21 days)                               | Ombitasvir, paritaprevir, and dasabuvir, and                                                                    | OATP1B1/1B3, BCRP | 2.59                          | 7.15                            | One-sequence / 12 healthy subjects     | Reduce dose of rosuvastatin  | (FDA, 2014m) |

ritonavir  
(paritaprevir/ritonavir 150 mg/100 mg QD + ombitasvir 25 mg QD + dasabuvir 400 mg BID 14 days)

Rilpivirine (25 mg QD 28 days)

Ombitasvir, paritaprevir, dasabuvir, and ritonavir (paritaprevir/ritonavir 150 mg/100 mg QD + ombitasvir 25 mg QD + dasabuvir 400 mg BID 14

CYP3A

2.59

2.20

One-sequence / 9 healthy subjects

Not recommend for co-administration

(FDA, 2014m)

days)

|                                    |                                                    |                   |                                                             |                                                             |                                           |                                                          |              |
|------------------------------------|----------------------------------------------------|-------------------|-------------------------------------------------------------|-------------------------------------------------------------|-------------------------------------------|----------------------------------------------------------|--------------|
| Carbamazepine (300 mg BID 31 days) | Brivaracetam (200 mg BID 13 days)                  | Epoxide hydrolase | 2.57 (carbamazepine-10,11-epoxide), carbamazepine no change | 2.64 (carbamazepine-10,11-epoxide), carbamazepine no change | One-sequence / 13 healthy male nonsmokers | Reduce dose of carbamazepine                             | (FDA, 2016a) |
| Amlodipine (5 mg SD)               | Ombitasvir, paritaprevir, dasabuvir, and ritonavir | CYP3A             | 2.57                                                        | 1.26                                                        | One-sequence / 14 healthy subjects        | Reduce dose of amlodipine; monitor for adverse reactions | (FDA, 2014m) |

(paritaprevir/ritonavir 150 mg/100 mg QD + ombitasvir 25 mg QD + dasabuvir 250 mg BID 24 days)

|                        |                                                    |            |      |      |                                        |                               |              |
|------------------------|----------------------------------------------------|------------|------|------|----------------------------------------|-------------------------------|--------------|
| Midazolam (7.5 mg SD)  | Netupitant (300 mg SD)                             | CYP3A      | 2.44 | 1.40 | Random Crossover / 20 healthy subjects | Caution with CYP3A substrates | (FDA, 2014a) |
| Sofosbuvir (400 mg SD) | Elbasvir and grazoprevir (50 mg/200 mg QD 15 days) | BCRP       | 2.44 | 2.27 | One-sequence / 16 healthy nonsmokers   | None                          | (FDA, 2016f) |
| Sofosbuvir (400 mg SD) | Velpatasvir (150 mg QD 10 days)                    | P-gp, BCRP | 2.38 | 1.81 | One-sequence / 186 healthy             | None (combination drug)       | (FDA, 2016b) |

|                                                                |                                |        |                                |                                  |                                                |                                                     |              |
|----------------------------------------------------------------|--------------------------------|--------|--------------------------------|----------------------------------|------------------------------------------------|-----------------------------------------------------|--------------|
|                                                                |                                |        |                                |                                  | subjects                                       |                                                     |              |
| Metoprolol (50 mg SD)                                          | Eliglustat (150 mg BID 5 days) | CYP2D6 | 2.33 (EM), 1.63 (IM)           | 1.72 (EM), 1.19 (IM)             | One-sequence / 8 healthy subjects (CYP2D6 EMs) | Caution; reduce dose of sensitive CYP2D6 substrates | (FDA, 2014c) |
| Dextromethorphan (60 mg SD)                                    | Panobinostat (20 mg QD 3 days) | CYP2D6 | 2.30                           | 3.00                             | One-sequence / 14 patients (CYP2D6 EMs)        | Avoid sensitive or NTR CYP2D6 substrates            | (FDA, 2015g) |
| Dexamethasone (20 mg on Day 1 followed by 8 mg BID on Day 2-4) | Netupitant (300 mg SD)         | CYP3A  | 2.30 (AUC <sub>84-108h</sub> ) | 1.65 (C <sub>max8-4-108h</sub> ) | Random crossover / 30 healthy subjects         | Reduce dose of dexamethasone                        | (FDA, 2014a) |
| Dexamethasone (20 mg on Day                                    | Netupitant (300 mg SD)         | CYP3A  | 2.30 (AUC <sub>24-</sub>       | 1.60 (C <sub>max2-</sub>         | Random crossover / 30                          | Reduce dose of dexamethasone                        | (FDA,        |

|                                  |                                                                                                                                                   |             |      |        |                                    |      |              |
|----------------------------------|---------------------------------------------------------------------------------------------------------------------------------------------------|-------------|------|--------|------------------------------------|------|--------------|
| 1 followed by 8 mg BID on Day 2) | mg SD)                                                                                                                                            |             | 36h) | 4-36h) | healthy subjects                   |      | 2014a)       |
| Ritonavir (100 mg QD 28 days)    | Ombitasvir, paritaprevir, dasabuvir, and ritonavir (paritaprevir/ritonavir 150 mg/100 mg QD + ombitasvir 25 mg QD + dasabuvir 400 mg BID 14 days) | CYP3A, P-gp | 2.27 | 1.36   | One-sequence / 12 healthy subjects | None | (FDA, 2014m) |
| Raltegravir (400 mg BID 17 days) | Ombitasvir, paritaprevir, dasabuvir, and                                                                                                          | UGT1A1      | 2.26 | 2.27   | One-sequence / 12 healthy subjects | None | (FDA, 2014m) |

ritonavir  
 (paritaprevir/ritonavir 150 mg/100 mg QD + ombitasvir 25 mg QD + dasabuvir 400 mg BID 14 days)

|                         |                                                                          |                 |      |      |                                                   |                                                          |              |
|-------------------------|--------------------------------------------------------------------------|-----------------|------|------|---------------------------------------------------|----------------------------------------------------------|--------------|
| Rosuvastatin (10 mg SD) | Elbasvir and grazoprevir (50 mg/200 mg QD 11 days)                       | BCRP, OATP1B1/3 | 2.25 | 5.51 | One-sequence / 11 healthy white/latino nonsmokers | Reduce dose of rosuvastatin                              | (FDA, 2016d) |
| Tacrolimus (5 mg SD)    | Isavuconazonium sulfate (equivalent to 200 mg isavuconazole TID 13 days) | CYP3A4          | 2.25 | 1.42 | N/P                                               | Monitor tacrolimus concentrations; adjust dose as needed | (FDA, 2015e) |



|                                         |                                                                                                                        |                   |      |      |                                    |                                                                   |              |
|-----------------------------------------|------------------------------------------------------------------------------------------------------------------------|-------------------|------|------|------------------------------------|-------------------------------------------------------------------|--------------|
| Sofosbuvir (400 mg SD)                  | Ledipasvir (90 mg QD 11 days)                                                                                          | P-gp, BCRP        | 2.21 | 2.02 | One-sequence / 17 healthy subjects | None (combination drug)                                           | (FDA, 2014e) |
| Atorvastatin (400 mg QD 12 or 24 weeks) | Simeprevir (150 mg QD 12 days)                                                                                         | OATP1B1/3, CYP3A4 | 2.19 | 1.66 | One-sequence / 36 healthy subjects | Reduce and titrate the statin dose; monitor for adverse reactions | (FDA, 2013i) |
| Sulfasalazine (500 mg SD)               | Rolapitant (200 mg SD)                                                                                                 | BCRP              | 2.18 | 2.38 | One-sequence / 20                  | Monitor for adverse reactions                                     | (FDA, 2015o) |
| Ketoconazole (400 mg QD 6 days)         | Ombitasvir, paritaprevir, dasabuvir, and ritonavir (paritaprevir/ritonavir/ombitasvir 150 mg/100 mg /25 mg + dasabuvir | CYP3A             | 2.15 | 1.13 | One-sequence / 12 healthy subjects | Reduce dose of ketoconazole                                       | (FDA, 2014m) |

|                                                          |                                                                                                                                                                                      |        |      |      |                               |                               |  |                 |
|----------------------------------------------------------|--------------------------------------------------------------------------------------------------------------------------------------------------------------------------------------|--------|------|------|-------------------------------|-------------------------------|--|-----------------|
|                                                          | 250 mg SD)                                                                                                                                                                           |        |      |      |                               |                               |  |                 |
| Buprenorphine<br>(median 16 (4-<br>24) mg QD 25<br>days) | Ombitasvir,<br>paritaprevir,<br>dasabuvir, and<br>ritonavir<br><br>(paritaprevir/ritona<br>vir 150 mg/100<br>mg QD +<br>ombitasvir 25 mg<br>QD + dasabuvir<br>400 mg BID 14<br>days) | CYP3A  | 2.05 | 2.00 | One-sequence<br>/ 10 patients | Monitor for adverse reactions |  | (FDA,<br>2014m) |
| Midazolam (3<br>mg SD)                                   | Isavuconazonium<br>sulfate (equivalent<br>to 200 mg<br>isavuconazole<br>three time daily 11                                                                                          | CYP3A4 | 2.03 | 1.72 | N/P                           | Reduce dose of midazolam      |  | (FDA,<br>2015e) |

days)

*1.25 ≤ AUC ratios < 2 with dose recommendation*

|                                                                                                       |                                                      |                 |      |      |                                      |                                                    |              |
|-------------------------------------------------------------------------------------------------------|------------------------------------------------------|-----------------|------|------|--------------------------------------|----------------------------------------------------|--------------|
| Atorvastatin (10 mg SD)                                                                               | Elbasvir and grazoprevir (50 mg/200 mg QD 9-13 days) | BCRP, OATP1B1/3 | 1.95 | 4.33 | One-sequence / 16 healthy nonsmokers | Reduce dose of atorvastatin                        | (FDA, 2016d) |
| Tenofovir (tenofovir DF 300 mg QD 28 days, administered with efavirenz and emtricitabine as ATRIPLA ) | Ledispavir and Sofosbuvir (90 mg/400 mg QD 14 days)  | P-gp            | 1.94 | 1.72 | One-sequence / 14 healthy subjects   | Monitor for tenofovir-associated adverse reactions | (FDA, 2014e) |
| Digoxin (0.5                                                                                          | Flibanserin (100                                     | P-gp            | 1.93 | 1.46 | Random crossover / 23                | Monitor digoxin concentrations                     | (FDA,        |

|                                |                                                                                       |              |                            |      |                                       |                                                         |              |
|--------------------------------|---------------------------------------------------------------------------------------|--------------|----------------------------|------|---------------------------------------|---------------------------------------------------------|--------------|
| mg SD)                         | mg QD 8 days)                                                                         |              |                            |      | healthy subjects                      |                                                         | 2015a)       |
| ledipasvir (30 mg QD 10 days)  | Simeprevir (150 mg QD 10 days)                                                        | P-gp         | 1.88 (AUC <sub>tau</sub> ) | 1.78 | Random crossover/ 22 healthy subjects | Not recommend for co-administration                     | (FDA, 2014e) |
| Sirolimus (2 mg SD)            | Isavuconazonium sulfate (equivalent to 200 mg isavuconazole three time daily 13 days) | CYP3A4       | 1.84                       | 1.65 | N/P                                   | Monitor sirolimus concentrations; adjust dose as needed | (FDA, 2015e) |
| Pravastatin (10 mg QD 17 days) | Ombitasvir, Paritaprevir, Dasabuvir, and Ritonavir (paritaprevir/ritona               | CYP3A, OATPs | 1.82                       | 1.36 | One-sequence/ 12 healthy subjects     | Reduce dose of pravastatin                              | (FDA, 2014m) |

vir/ombitasvir 150  
 mg/100 mg/25 mg  
 QD + dasabuvir  
 400 mg BID 14  
 days)

|                                                                                                                |                                                                |            |                                 |                                  |                                                 |                                                       |                                                 |
|----------------------------------------------------------------------------------------------------------------|----------------------------------------------------------------|------------|---------------------------------|----------------------------------|-------------------------------------------------|-------------------------------------------------------|-------------------------------------------------|
| Dexamethasone<br>(20 mg SD)                                                                                    | Netupitant (450<br>mg SD)                                      | CYP3A      | 1.82<br>(AUC <sub>0-24h</sub> ) | 1.22<br>(C <sub>max0-24h</sub> ) | Random<br>crossover / 30<br>healthy<br>subjects | Reduce dose of dexamethansone                         | (FDA,<br>2014a)                                 |
| Tenofovir<br>(tenofovir DF<br>300 mg<br>(administered<br>with<br>efavirenz/emtri<br>citabine as<br>ATRIPLA) QD | Sofosbuvir and<br>velpatasvir (400<br>mg/100 mg QD 14<br>days) | P-gp, BCRP | 1.81<br>(AUC <sub>tau</sub> )   | 1.77                             | One-sequence<br>/ 15 healthy<br>subjects        | Monitor for tenofovir-associated adverse<br>reactions | (FDA,<br>2016b;<br>Mogalian<br>et al.,<br>2016) |

28 days)

|                                                                          |                                           |                      |                                       |                                                     |                                                 |                                                                      |                 |
|--------------------------------------------------------------------------|-------------------------------------------|----------------------|---------------------------------------|-----------------------------------------------------|-------------------------------------------------|----------------------------------------------------------------------|-----------------|
| Dexamethasone<br>(20 mg on Day<br>1 followed by 8<br>mg BID on Day<br>2) | Netupitant (450<br>mg SD)                 | CYP3A                | 1.81<br>(AUC <sub>24-<br/>36h</sub> ) | 1.51<br>(C <sub>max</sub> <sub>2-<br/>4-36h</sub> ) | Random<br>crossover / 30<br>healthy<br>subjects | Reduce dose of dexamethasone                                         | (FDA,<br>2014a) |
| Simvastatin<br>(40 mg SD)                                                | Simeprevir (150<br>mg QD 12 days)         | CYP3A4,<br>OATP1B1/3 | 1.71                                  | 1.82                                                | One-sequence<br>/ 36 healthy<br>subjects        | Reduce and titrate the statin dose; monitor for<br>adverse reactions | (FDA,<br>2013i) |
| Caffeine (200<br>mg SD)                                                  | Obeticholic acid<br>(25 mg QD 14<br>days) | CYP1A2               | 1.65                                  | 1.10                                                | One-sequence<br>/ 21 healthy<br>subjects        | Monitor drug concentrations of CYP1A2<br>substrates with a NTR       | (FDA,<br>2016d) |
| Dexamethasone<br>(20 mg SD)                                              | Netupitant (300<br>mg SD)                 | CYP3A                | 1.64<br>(AUC <sub>0-<br/>24h</sub> )  | 1.09<br>(C <sub>max</sub> <sub>0-<br/>24h</sub> )   | Random<br>crossover / 30<br>healthy<br>subjects | Reduce dose of dexamethasone                                         | (FDA,<br>2014a) |

|                                                          |                                                                                                                                                            |                    |      |      |                                                            |                                                         |                 |
|----------------------------------------------------------|------------------------------------------------------------------------------------------------------------------------------------------------------------|--------------------|------|------|------------------------------------------------------------|---------------------------------------------------------|-----------------|
| Rosuvastatin<br>(10 mg SD)                               | grazoprevir (200<br>mg QD 9 days)                                                                                                                          | BCRP,<br>OATP1B1/3 | 1.59 | 4.25 | One-sequence<br>/ 11 healthy<br>white/latino<br>nonsmokers | Reduce dose of rosuvastatin                             | (FDA,<br>2016d) |
| Midazolam (2<br>mg SD)                                   | Palbociclib (125<br>mg QD 8 days)                                                                                                                          | CYP3A              | 1.58 | 1.38 | Random<br>crossover / 26<br>healthy<br>females             | Reduce dose of sensitive CYP3A substrates with<br>a NTR | (FDA,<br>2015h) |
| Buprenorphine<br>(median 16 (8-<br>24) mg QD 25<br>days) | Ombitasvir,<br>paritaprevir,<br>dasabuvir, and<br>ritonavir<br><br>(paritaprevir/ritona<br>vir 150 mg/100<br>mg QD +<br>ombitasvir 25 mg<br>QD + dasabuvir | CYP3A              | 1.58 | 1.26 | One-sequence<br>/ 10 patients                              | Monitor for sedation and cognitive effects              | (FDA,<br>2014m) |

400 mg BID 14  
days)

|                                                                            |                                                                                   |           |                                        |                                         |                                                                                  |                                                                                  |                 |
|----------------------------------------------------------------------------|-----------------------------------------------------------------------------------|-----------|----------------------------------------|-----------------------------------------|----------------------------------------------------------------------------------|----------------------------------------------------------------------------------|-----------------|
| dexamethasone<br>(20 mg on Day<br>1 followed by 8<br>mg BID on Day<br>2-4) | Netupitant (100<br>mg SD)                                                         | CYP3A     | 1.53<br>(AUC <sub>84-<br/>108h</sub> ) | 1.39<br>(C <sub>max8<br/>4-108h</sub> ) | Random<br>crossover / 30<br>healthy<br>subjects                                  | Reduce dose of dexamethasone                                                     | (FDA,<br>2014a) |
| Simepravir (150<br>mg QD 7 days)                                           | Daclatasvir (60<br>mg QD 7 days)                                                  | OATP1B1/3 | 1.51                                   | 1.43                                    | Random<br>crossover / 24<br>healthy<br>nonsmokers                                | Reduce dose of daclatasvir <sup>b</sup>                                          | (FDA,<br>2015f) |
| Digoxin (0.25<br>mg SD)                                                    | Eliglustat (150 mg<br>in EMs, UMs, and<br>IMs and 100 mg<br>in PMs BID 7<br>days) | P-gp      | 1.49<br>(AUC <sub>last</sub> )         | 1.71                                    | One-sequence<br>/ 27 healthy<br>subjects<br>(CYP2D6<br>EMs [n=19],<br>UMs [n=4], | Reduce dose; monitor drug concentrations of<br>digoxin and other P-gp substrates | (FDA,<br>2014c) |



|                             |                                     |                    |                                |      |                                        |                                                             |              |
|-----------------------------|-------------------------------------|--------------------|--------------------------------|------|----------------------------------------|-------------------------------------------------------------|--------------|
|                             |                                     |                    |                                |      | IM [n=1],<br>PMs [n=4]                 |                                                             |              |
| Midazolam (2 mg SD (syrup)) | Suvorexant (80 mg QD 14 days)       | CYP3A              | 1.47                           | 1.23 | One-sequence / 12 healthy subjects     | Monitor patients on sensitive CYP3A substrates with a NTR   | (FDA, 2014b) |
| Rosuvastatin (10 mg SD)     | Daclatasvir (60 mg QD 9 days)       | BCRP,<br>OATP1B1/3 | 1.47                           | 1.84 | One-sequence / 21 healthy subjects     | Monitor for adverse events                                  | (FDA, 2015f) |
| Midazolam (0.075 mg/kg SD)  | Simeprevir (150 mg QD 11 days)      | CYP3A4             | 1.43<br>(AUC <sub>last</sub> ) | 1.31 | Random crossover / 16 healthy subjects | Caution is warranted when midazolam is co-administered      | (FDA, 2013i) |
| Caffeine (200 mg SD)        | Obeticholic acid (10 mg QD 14 days) |                    | 1.42                           | 1.06 | One-sequence / 21 healthy subjects     | Monitor drug concentrations of CYP1A2 substrates with a NTR | (FDA, 2016d) |
| Tacrolimus (2 mg SD)        | Elbasvir and                        | CYP3A              | 1.42                           | 1.7  | One-sequence                           | Monitor for tacrolimus concentrations, renal                | (FDA,        |

|                                                                                    |                                                                |            |                       |                     |                                        |                                                                  |                               |
|------------------------------------------------------------------------------------|----------------------------------------------------------------|------------|-----------------------|---------------------|----------------------------------------|------------------------------------------------------------------|-------------------------------|
| mg SD)                                                                             | grazoprevir (50 mg/200 mg QD 16 days)                          |            |                       | (C <sub>min</sub> ) | / 16 healthy nonsmokers                | function, and tacrolimus-related side effects                    | 2016f)                        |
| Docetaxel (75-100 mg/m <sup>2</sup> IV SD in combination with 0.5 mg palonosetron) | Netupitant (300 mg SD in combination with 0.5 mg palonosetron) | CYP3A      | 1.42                  | 1.49                | Random crossover / 6 patients          | Caution; monitor for chemotherapeutic related adverse reactions  | (FDA, 2014a)                  |
| Rosuvastatin (20 mg SD)                                                            | Eluxadoline (100 mg SD)                                        | OATP1B1    | 1.41                  | 1.18                | Random crossover / 27 healthy subjects | Reduce dose of rosuvastatin; caution for statin-related toxicity | (FDA, 2015p)                  |
| Tenofovir (300 mg QD 8 days with a moderate fat meal (as                           | Sofosbuvir and velpatasvir (400 mg/100 mg QD 8 days)           | P-gp, BCRP | 1.40                  | 1.44                | Random crossover / 24 healthy subjects | Monitor for tenofovir-associated adverse reactions               | (FDA, 2016b; Mogalian et al., |
|                                                                                    |                                                                |            | (AUC <sub>tau</sub> ) |                     |                                        |                                                                  |                               |

|                   |                     |            |                       |      |                |                                          |          |
|-------------------|---------------------|------------|-----------------------|------|----------------|------------------------------------------|----------|
| emtricitabine/ril |                     |            |                       |      |                |                                          | 2016)    |
| pivirine/tenofov  |                     |            |                       |      |                |                                          |          |
| ir DF:            |                     |            |                       |      |                |                                          |          |
| 200/25/300 mg;    |                     |            |                       |      |                |                                          |          |
| COMPLERA))        |                     |            |                       |      |                |                                          |          |
| Tenofovir (300    | Sofosbuvir and      | P-gp, BCRP | 1.40                  | 1.46 | Random         | Monitor for tenofovir-associated adverse | (FDA,    |
| mg QD 7 days      | velpatasvir (400    |            | (AUC <sub>tau</sub> ) |      | crossover / 30 | reactions                                | 2016b;   |
| with breakfast    | mg/100 mg QD 7      |            |                       |      | healthy        |                                          | Mogalian |
| (as               | days)               |            |                       |      | subjects       |                                          | et al.,  |
| emtricitabine/te  |                     |            |                       |      |                |                                          | 2016)    |
| nofovir DF        |                     |            |                       |      |                |                                          |          |
| 200/300 mg)       |                     |            |                       |      |                |                                          |          |
| co-administered   |                     |            |                       |      |                |                                          |          |
| with raltegravir  |                     |            |                       |      |                |                                          |          |
| 400 mg BID)       |                     |            |                       |      |                |                                          |          |
| Atorvastatin (20  | Isavuconazonium     | CYP3A4     | 1.40                  | 1.05 | N/P            | Caution; monitor for adverse reactions   | (FDA,    |
| mg SD)            | sulfate (equivalent |            |                       |      |                |                                          | 2015e)   |

to 200 mg  
 isavuconazole TID  
 8 days)

|                                                                                                                                                    |                                                       |            |                            |      |                                        |                                                    |                                     |
|----------------------------------------------------------------------------------------------------------------------------------------------------|-------------------------------------------------------|------------|----------------------------|------|----------------------------------------|----------------------------------------------------|-------------------------------------|
| Tenofovir (300 mg QD 10 days with breakfast (as emtricitabine/tenofovir DF 200/300 mg) co-administered with darunavir 800 mg and ritonavir 100 mg) | Sofosbuvir and velpatasvir (400 mg/100 mg QD 10 days) | P-gp, BCRP | 1.39 (AUC <sub>tau</sub> ) | 1.55 | Random crossover / 29 healthy subjects | Monitor for tenofovir-associated adverse reactions | (FDA, 2016b; Mogalian et al., 2016) |
| Digoxin (0.25 mg SD)                                                                                                                               | Simeprevir (150 mg QD 7 days)                         | P-gp       | 1.39                       | 1.31 | N/P / 16                               | Monitor digoxin concentrations                     | (FDA, 2013i)                        |

|                                |                                                                                                                                              |       |                           |                            |                                    |                                                        |              |
|--------------------------------|----------------------------------------------------------------------------------------------------------------------------------------------|-------|---------------------------|----------------------------|------------------------------------|--------------------------------------------------------|--------------|
| Mycophenylate mofetil (1 g SD) | Isavuconazonium sulfate (equivalent to 200 mg isavuconazole TID 8 days)                                                                      | UGTs  | 1.35 (mycoph enolic acid) | 0.89 (myco pheno lic acid) | N/P                                | Monitor for mycophenolic acid-related toxicity         | (FDA, 2015e) |
| Alprazolam (0.5 mg SD)         | Ombitasvir, Paritaprevir, Dasabuvir, and Ritonavir (paritaprevir/ritonavir/ombitasvir 150 mg/100 mg/25 mg QD + dasabuvir 250 mg BID 18 days) | CYP3A | 1.34                      | 1.09                       | One-sequence / 12 healthy subjects | Monitor patients ; reduce dose of alprazolam as needed | (FDA, 2014m) |
| Digoxin (0.25 mg SD)           | Velpatasvir (100 mg QD 4 days)                                                                                                               | P-gp  | 1.34                      | 1.88                       | Random crossover / 21              | Monitor digoxin concentrations                         | (FDA, 2016b; |

|                                                                                                                                    |                                                       |            |                              |                               |                                        |                                                    |                                     |
|------------------------------------------------------------------------------------------------------------------------------------|-------------------------------------------------------|------------|------------------------------|-------------------------------|----------------------------------------|----------------------------------------------------|-------------------------------------|
|                                                                                                                                    |                                                       |            |                              |                               | healthy subjects                       |                                                    | Mogalian et al., 2016)              |
| Tenofovir (300 mg QD 10 days with a moderate fat meal (as elvitegravir/cobicistat/emtricitabine/tenofovir DF: 150/150/200/300 mg)) | Sofosbuvir and velpatasvir (400 mg/100 mg QD 10 days) | P-gp, BCRP | 1.34 (AUC <sub>tau</sub> )   | 1.36                          | Random crossover / 24 healthy subjects | Monitor for tenofovir-associated adverse reactions | (FDA, 2016b; Mogalian et al., 2016) |
| Dexamethasone (20 mg SD)                                                                                                           | Netupitant (100 mg SD)                                | CYP3A      | 1.33 (AUC <sub>0-24h</sub> ) | 1.03 (C <sub>max0-24h</sub> ) | Random crossover / 30 healthy          | Reduce dose of dexamethasone                       | (FDA, 2014a)                        |

|                                                                     |                                                 |                                                |                                      |                                      | subjects                                         |                                                                                     |                       |
|---------------------------------------------------------------------|-------------------------------------------------|------------------------------------------------|--------------------------------------|--------------------------------------|--------------------------------------------------|-------------------------------------------------------------------------------------|-----------------------|
| Warfarin (25 mg SD)                                                 | Obeticholic acid (25 mg QD 13 days)             | R-warfarin: CYP1A2, CYP3A4, S-warfarin: CYP2C9 | 1.32 (R-warfarin), 1.18 (S-warfarin) | 1.05 (R-warfarin), 1.06 (S-warfarin) | One-sequence / 22 healthy subjects               | Monitor International Normalized Ratio (INR); adjust dose of warfarin as needed     | (FDA, 2016d)          |
| (S)-warfarin (dose N/P, SD as part of the Cooperstown 5+1 cocktail) | Oritavancin (1200 mg single IV)                 | CYP2C9                                         | 1.32                                 | N/P                                  | Cocktail study, one-sequence/16 healthy subjects | Caution for potential risk of bleeding and frequently monitor for signs of bleeding | (FDA, 2014k)          |
| Tenofovir (300 mg QD 10 days with breakfast                         | Sofosbuvir and velpatasvir (400 mg/100 mg QD 10 | P-gp, BCRP                                     | 1.30 (AUC <sub>tau</sub> )           | 1.55                                 | Random crossover / 24 healthy                    | Monitor for tenofovir-associated adverse reactions                                  | (FDA, 2016b; Mogalian |

|                                                                                                                                  |                                                                                     |        |      |      |                               |                                                               |                  |
|----------------------------------------------------------------------------------------------------------------------------------|-------------------------------------------------------------------------------------|--------|------|------|-------------------------------|---------------------------------------------------------------|------------------|
| (as<br>emtricitabine/te<br>nofovir DF<br>200/300 mg)<br>co-administered<br>with atazanavir<br>300 mg and<br>ritonavir 100<br>mg) | days)                                                                               |        |      |      | subjects                      |                                                               | et al.,<br>2016) |
| Cyclosporine<br>(300 mg SD)                                                                                                      | Isavuconazonium<br>sulfate (equivalent<br>to 200 mg<br>isavuconazole TID<br>8 days) | CYP3A4 | 1.30 | 1.10 | N/P                           | Monitor cyclosporine concentrations; adjust<br>dose as needed | (FDA,<br>2015e)  |
| Naloxone<br>(median 4 (1-6)<br>mg QD 25                                                                                          | Ombitasvir,<br>paritaprevir,<br>dasabuvir, and                                      | UGT1A1 | 1.30 | 1.25 | One-sequence<br>/ 12 patients | Monitor for sedation and cognitive effects                    | (FDA,<br>2014m)  |



|                                         |                                                                                                             |        |      |      |                                          |                                                                           |  |              |
|-----------------------------------------|-------------------------------------------------------------------------------------------------------------|--------|------|------|------------------------------------------|---------------------------------------------------------------------------|--|--------------|
| days)                                   | ritonavir<br>(paritaprevir/ritonavir 150 mg/100 mg QD + ombitasvir 25 mg QD + dasabuvir 400 mg BID 14 days) |        |      |      |                                          |                                                                           |  |              |
| (S)-warfarin (racemic warfarin 5 mg SD) | Venetoclax (400 mg SD)                                                                                      | CYP2C9 | 1.28 | 1.18 | One-sequence / 3 healthy female subjects | Monitor for INR                                                           |  | (FDA, 2016e) |
| Digoxin (0.125 mg QD 20 days)           | Daclatasvir (60 mg QD 10 days)                                                                              | P-gp   | 1.27 | 1.65 | One-sequence / 15 healthy subjects       | Monitor digoxin concentrations; adjust digoxin doses if necessary         |  | (FDA, 2015f) |
| Digoxin (0.5 mg SD)                     | Rolapitant (180 mg SD)                                                                                      | P-gp   | 1.27 | 1.67 | One-sequence / 16                        | Monitor for adverse reactions associated with P-gp substrates with an NTR |  | (FDA, 2015o) |

|                             |                                                                          |       |      |      |                                        |                                                                           |              |
|-----------------------------|--------------------------------------------------------------------------|-------|------|------|----------------------------------------|---------------------------------------------------------------------------|--------------|
| Digoxin (0.5 mg SD)         | Suvorexant (40 mg QD 11 days)                                            | P-gp  | 1.27 | 1.21 | Random crossover / 19 healthy subjects | Monitor digoxin concentrations                                            | (FDA, 2014b) |
| Digoxin (0.5 mg SD)         | Isavuconazonium sulfate (equivalent to 200 mg isavuconazole TID 12 days) | P-gp  | 1.25 | 1.33 | N/P                                    | Adjust dose of P-gp substrates with a NTR; monitor digoxin concentrations | (FDA, 2015e) |
| Midazolam (2 mg SD (syrup)) | Suvorexant (80 mg QD 4 days)                                             | CYP3A | 1.25 | 1.06 | One-sequence / 12 healthy subjects     | Monitor patients on sensitive CYP3A substrates with a NTR                 | (FDA, 2014b) |

---

Drugs were orally administered unless specified; either CYP3A or CYP3A4 depending on how the enzyme is presented in the NDA reviews.

BID, twice daily; EM, extensive metabolizer; IM, intermediate metabolizer; INR, International normalized ratio; IV, intravenously; N/P – not provided; NTR, narrow therapeutic range; PM, poor metabolizer; QD, once daily; SD, single dose; TID, three times daily; UM, ultrarapid metabolizer

<sup>a</sup> – Because norgestimate is in combination with ethinyl estradiol, according to the product label, “Although there is no labeling recommendation specific to norgestimate, ethinyl estradiol-containing oral contraceptives are contraindicated with Viekira Pak due to potential alanine aminotransferase elevation”

<sup>b</sup> – Labeling recommendations are extracted from the NDA Clinical Pharmacology and Biopharmaceutics Review(s)

Supplemental Table 6. Induction DDIs, NMEs as inducers

| Victim Drug<br>(Dose)                 | Inducer (Dose)                                               | Main Enzymes<br>/Transporters<br>Possibly<br>Involved | AUC<br>Ratio | C <sub>max</sub><br>Ratio | Study Design /<br>Population             | Labeling Impact                                         | Reference       |
|---------------------------------------|--------------------------------------------------------------|-------------------------------------------------------|--------------|---------------------------|------------------------------------------|---------------------------------------------------------|-----------------|
| <i>AUC ratios ≤ 0.2</i>               |                                                              |                                                       |              |                           |                                          |                                                         |                 |
| Itraconazole<br>(200 mg QD 7<br>days) | Ivacaftor and<br>lumacaftor (250<br>mg/200 mg BID 7<br>days) | CYP3A                                                 | 0.18         | 0.10                      | One-sequence<br>/ 17 healthy<br>subjects | Not recommend with sensitive or NTR CYP3A<br>substrates | (FDA,<br>2015k) |
| Ivacaftor (200<br>mg QD 14<br>days)   | Lumacaftor (150<br>mg BID 14 days)                           | CYP3A                                                 | 0.20         | 0.19                      | One-sequence<br>/ 17 healthy<br>subjects | Not recommend with sensitive or NTR CYP3A<br>substrates | (FDA,<br>2015k) |
| <i>0.2 &lt; AUC ratios ≤ 0.5</i>      |                                                              |                                                       |              |                           |                                          |                                                         |                 |
| Ivacaftor (200<br>mg QD 14)           | Lumacaftor (250<br>mg BID 14 days)                           | CYP3A                                                 | 0.21         | 0.25                      | One-sequence<br>/ 16 healthy             | Not recommend with sensitive or NTR CYP3A<br>substrates | (FDA,<br>2015k) |

|                                                           |                                             |        |      |      |                                        |                                                                                                                |              |
|-----------------------------------------------------------|---------------------------------------------|--------|------|------|----------------------------------------|----------------------------------------------------------------------------------------------------------------|--------------|
| days)                                                     |                                             |        |      |      | subjects                               |                                                                                                                |              |
| Ivacaftor (400 mg QD 14 days)                             | Lumacaftor (150 mg BID 14 days)             | CYP3A  | 0.26 | 0.43 | One-sequence / 13 healthy subjects     | Not recommend with sensitive or NTR CYP3A substrates                                                           | (FDA, 2015k) |
| days)                                                     |                                             |        |      |      | subjects                               |                                                                                                                |              |
| Midazolam (3 mg SD)                                       | Dabrafenib (150 mg BID repeated dosing)     | CYP3A  | 0.26 | 0.39 | N/P/ 12 patients                       | Caution for efficacy loss of drugs that are sensitive substrates of CYP3A4, CYP2C8, CYP2C9, CYP2C19, or CYP2B6 | (FDA, 2013m) |
| <i>0.5 &lt; AUC ratios ≤ 0.8 with dose recommendation</i> |                                             |        |      |      |                                        |                                                                                                                |              |
| Simvastatin (80 mg SD)                                    | Eslicarbazepine acetate (800 mg QD 14 days) | CYP3A  | 0.51 | 0.39 | Random crossover / 24 healthy subjects | Adjust dose of simvastatin if necessary                                                                        | (FDA, 2013c) |
| Bupropion (dosing regimen N/P)                            | Isavuconazonium sulfate (200 mg QD)         | CYP2B6 | 0.58 | 0.69 | N/P                                    | Increase dose of bupropion                                                                                     | (FDA, 2015e) |
| Amlodipine (5                                             | Lesinurad (400 mg                           | CYP3A  | 0.58 | 0.61 | One-sequence                           | Monitor for a potential reduction in efficacy of                                                               | (FDA,        |

|                         |                                                                                                                                                    |                       |      |      |                                    |                                                                               |              |
|-------------------------|----------------------------------------------------------------------------------------------------------------------------------------------------|-----------------------|------|------|------------------------------------|-------------------------------------------------------------------------------|--------------|
| mg QD 28 days)          | QD 24 days)                                                                                                                                        |                       |      |      | / 13 healthy males                 | sensitive CYP3A substrates                                                    | 2015s)       |
| Omeprazole (40 mg SD)   | Ombitasvir, paritaprevir, dasabuvir, and ritonavir (paritaprevir/ritonavir 150/100 QD + ombitasvir 25 mg once daily+ dasabuvir 250 mg BID 19 days) | CYP2C19               | 0.62 | 0.62 | One-sequence / 11 healthy subjects | Monitor for decreased efficacy; increase dose of omeprazole dose if necessary | (FDA, 2014m) |
| Rosuvastatin (40 mg SD) | Eslicarbazepine acetate (400 mg QD for 7 days, then 800 mg QD for 7 days, then                                                                     | OATP1B1/3 and/or BCRP | 0.65 | 0.65 | One-sequence / 30 healthy subjects | Adjust dose of rosuvastatin if necessary                                      | (FDA, 2013c) |

|                                |                                                       |                    |      |                   |                                               |                                                                             |              |
|--------------------------------|-------------------------------------------------------|--------------------|------|-------------------|-----------------------------------------------|-----------------------------------------------------------------------------|--------------|
|                                | 1200 mg QD for 17 days                                |                    |      |                   |                                               |                                                                             |              |
| Sildenafil (50 mg SD)          | Lesinurad and allopurinol (300 mg/ 200 mg QD 10 days) | CYP3A              | 0.66 | 0.66              | Random crossover / 12 healthy males           | Monitor for a potential reduction in efficacy of sensitive CYP3A substrates | (FDA, 2015s) |
| Ritonavir (100 mg BID)         | Isavuconazonium sulfate (multiple doses)              | CYP3A              | 0.69 | N/P               | N/P                                           | Caution for possible loss of antiviral efficacy                             | (FDA, 2015e) |
| Ethinyl estradiol (30 ug SD)   | Eslicarbazepine acetate (800 mg QD 15 days)           | CYP3A <sup>a</sup> | 0.69 | 0.91              | Random crossover / 19 healthy female subjects | Use additional or alternative non-hormonal birth control                    | (FDA, 2013c) |
| Dextromethorphan (dose N/P SD) | Oritavancin (1200 mg single IV)                       | CYP2D6             | N/P  | 0.69 <sup>b</sup> | Cocktail study, One-sequence/13 healthy       | Caution with NTR P450 substrates                                            | (FDA, 2014k) |

subjects

|                                               |                                                                                                                                             |       |      |      |                                    |                                                 |              |
|-----------------------------------------------|---------------------------------------------------------------------------------------------------------------------------------------------|-------|------|------|------------------------------------|-------------------------------------------------|--------------|
| Lopinavir (400 mg BID)                        | Isavuconazonium sulfate (multiple doses)                                                                                                    | CYP3A | 0.73 | N/P  | N/P                                | Caution for possible loss of antiviral efficacy | (FDA, 2015e) |
| Darunavir (with ritonavir, 800 mg QD 28 days) | Ombitasvir, paritaprevir, dasabuvir, and ritonavir (paritaprevir/ritonavir 150/100 QD + ombitasvir 25 mg QD + dasabuvir 250 mg BID 14 days) | CYP3A | 0.74 | 0.78 | One-sequence / 12 healthy subjects | Not recommend for co-administration             | (FDA, 2014m) |
| Darunavir (with ritonavir, 800 mg QD 28 days) | Ombitasvir, paritaprevir, dasabuvir, and                                                                                                    | CYP3A | 0.75 | 0.92 | One-sequence / 12 healthy subjects | Not recommend for co-administration             | (FDA, 2014m) |



days)            ritonavir  
 (paritaprevir/ritonavir 150/100 QD + ombitasvir 25 mg QD + dasabuvir 400 mg BID 14 days)

|                                                                   |                                                                                                                                                                 |              |             |             |                                           |                                            |                     |
|-------------------------------------------------------------------|-----------------------------------------------------------------------------------------------------------------------------------------------------------------|--------------|-------------|-------------|-------------------------------------------|--------------------------------------------|---------------------|
| <p>Darunavir<br/>         (with ritonavir, 600 mg QD 28 days)</p> | <p>Ombitasvir, paritaprevir, dasabuvir, and ritonavir<br/>         (paritaprevir/ritonavir 150/100 QD + ombitasvir 25 mg QD + dasabuvir 250 mg BID 14 days)</p> | <p>CYP3A</p> | <p>0.79</p> | <p>0.86</p> | <p>One-sequence / 12 healthy subjects</p> | <p>Not recommend for co-administration</p> | <p>(FDA, 2014m)</p> |
|-------------------------------------------------------------------|-----------------------------------------------------------------------------------------------------------------------------------------------------------------|--------------|-------------|-------------|-------------------------------------------|--------------------------------------------|---------------------|

---

Drugs were orally administered unless specified; either CYP3A or CYP3A4 depending on how the enzyme is presented in the NDA reviews.

BID, twice daily; IV, intravenously; N/P – not provided; NTR, narrow therapeutic range; QD, once daily; SD, single dose

<sup>a</sup> – Activation of UGT1A1 might also contribute

<sup>b</sup> – Changes in the concentration ratio of dextromethorphan to dextrorphan in urine

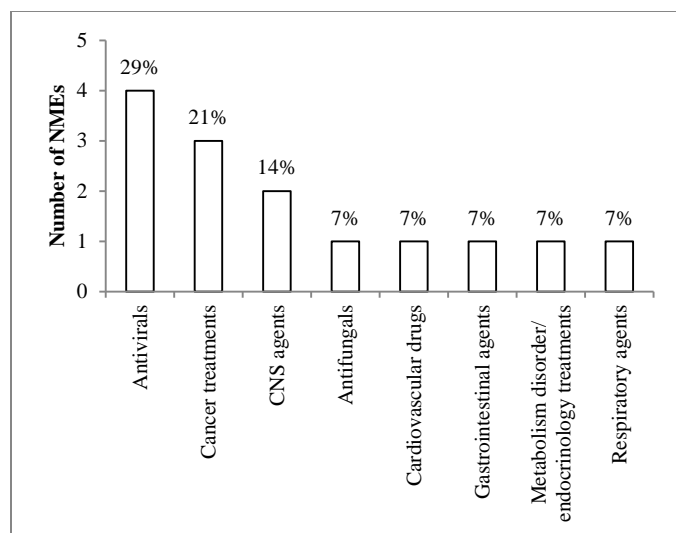

Supplemental Figure 1A. Therapeutic classes for inhibition DDIs with AUC ratios  $\geq 5$ , NME as substrate (N = 14)

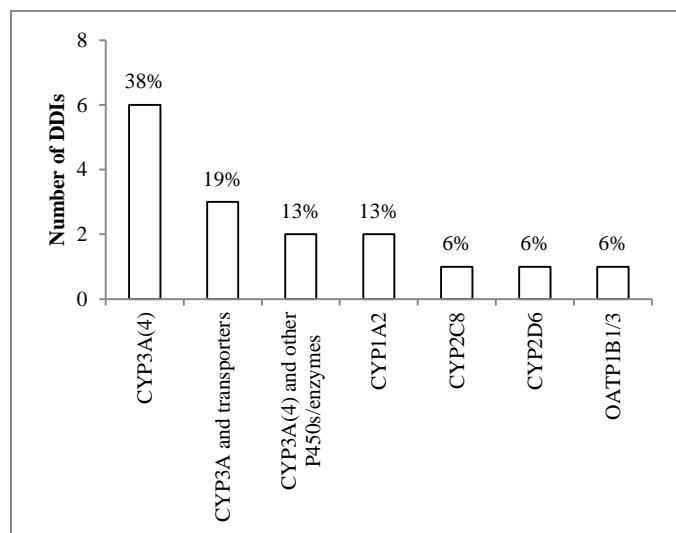

Supplemental Figure 1B. Mechanisms for inhibition DDIs with AUC ratios  $\geq 5$ , NME as substrate (N = 16)

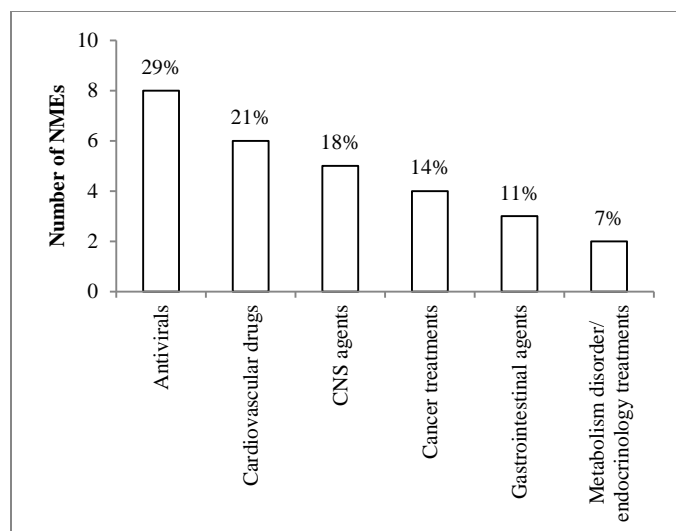

Supplemental Figure 1C. Therapeutic classes for inhibition DDIs with  $2 \leq \text{AUC ratios} < 5$ , NME as substrate (N = 28)

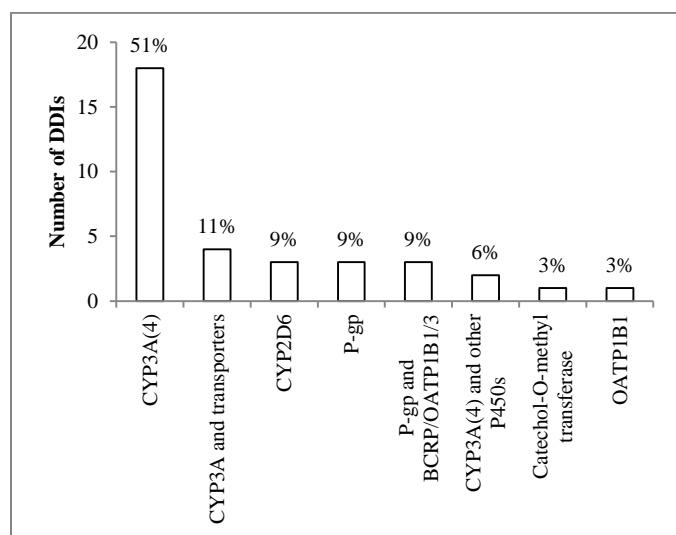

Supplemental Figure 1D. Mechanisms for inhibition DDIs with  $2 \leq \text{AUC ratios} < 5$ , NME as substrate (N = 35)

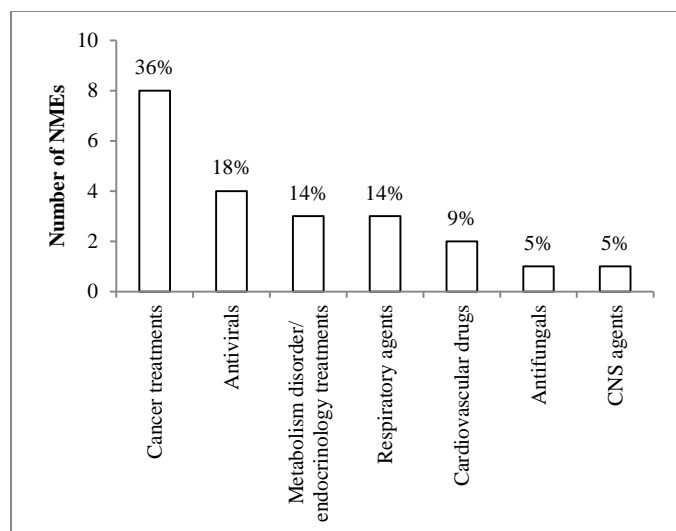

Supplemental Figure 1E. Therapeutic classes for inhibition DDIs with AUC ratios < 2, NME as substrate (N = 22)

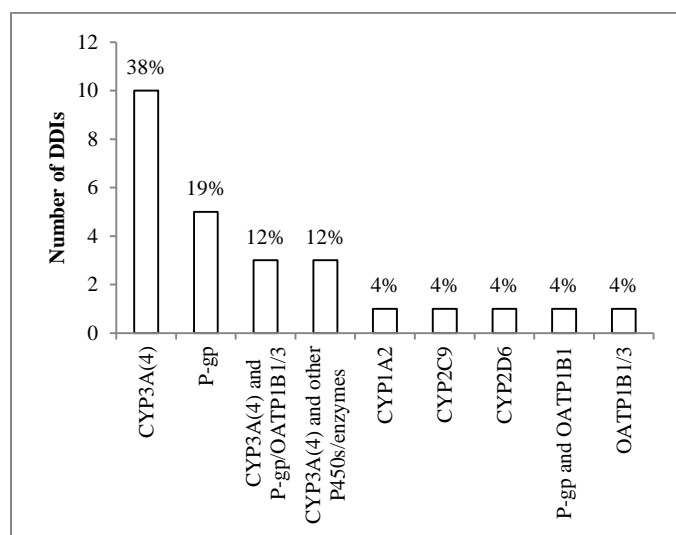

Supplemental Figure 1F. Mechanisms for inhibition DDIs with AUC ratios < 2, NME as substrate (N = 26)

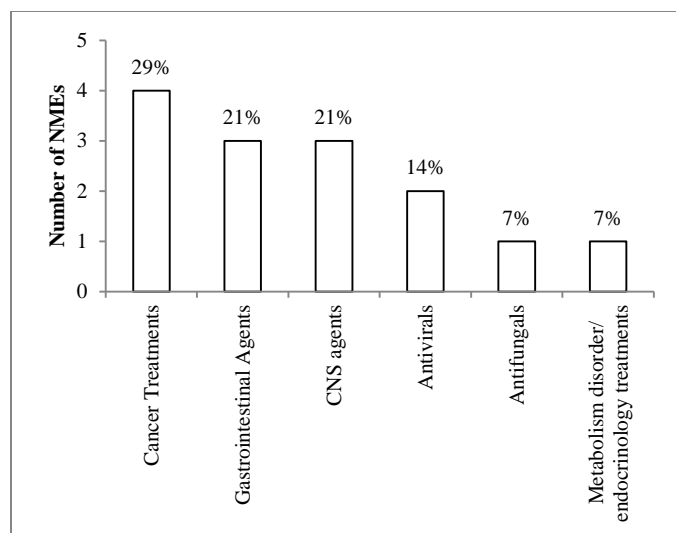

Supplemental Figure 2A. Therapeutic classes for induction DDIs with AUC ratios  $\leq 0.2$ , NME as substrate (N = 14)

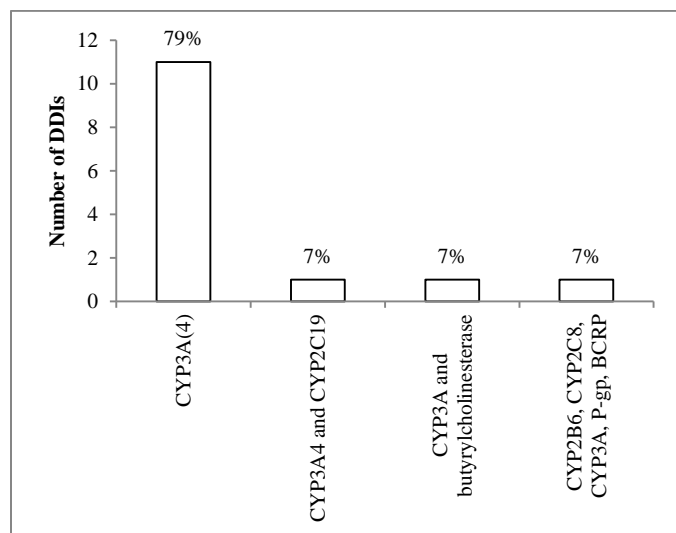

Supplemental Figure 2B. Mechanisms for induction DDIs (AUC ratios  $\leq 0.2$ ), NME as substrate (N = 14)

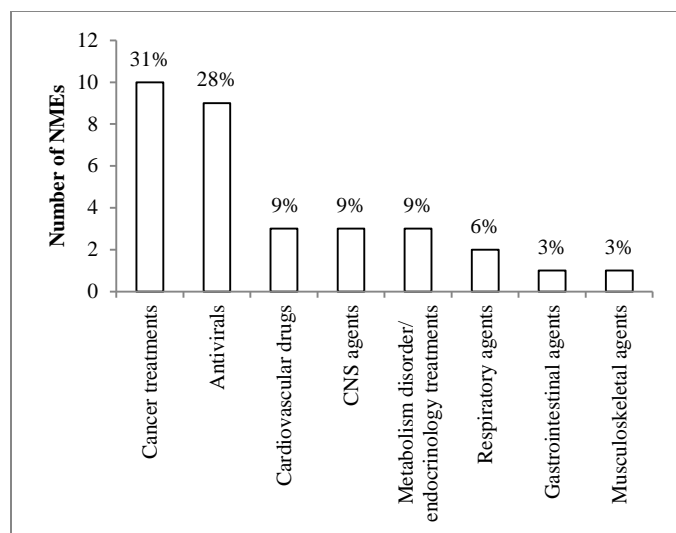

Supplemental Figure 2C. Therapeutic classes for induction DDIs with  $0.2 < \text{AUC ratios} \leq 0.5$ , NME as substrate (N = 32)

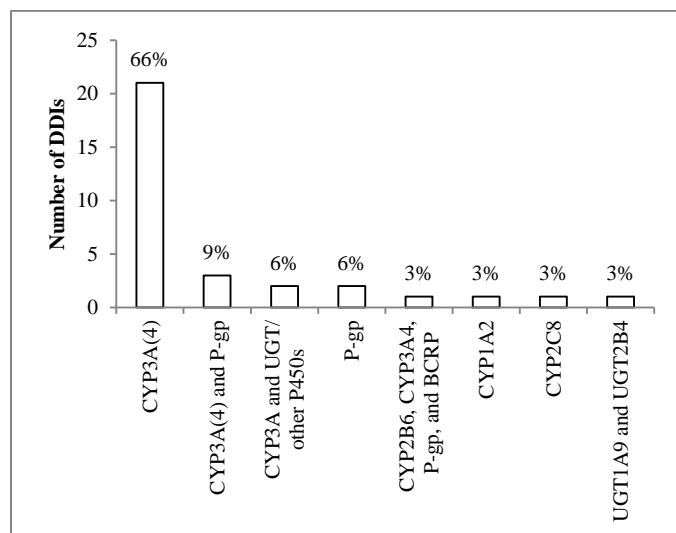

Supplemental Figure 2D. Mechanisms for induction DDIs ( $0.2 < \text{AUC ratios} \leq 0.5$ ), NME as substrate (N = 32)

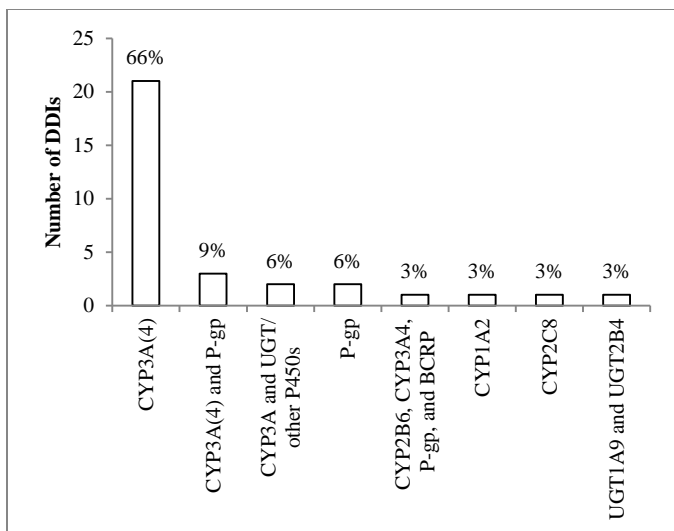

Supplemental Figure 2E. Therapeutic classes for induction DDIs with  $0.5 < \text{AUC ratios} \leq 0.8$ , NME as substrate (N = 11)

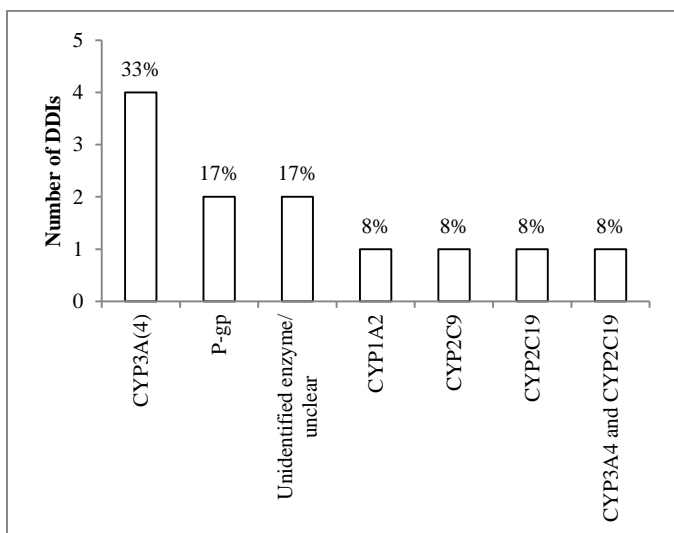

Supplemental Figure 2F. Mechanisms for induction DDIs ( $0.5 < \text{AUC ratios} \leq 0.8$ ), NME as substrate (N = 12)



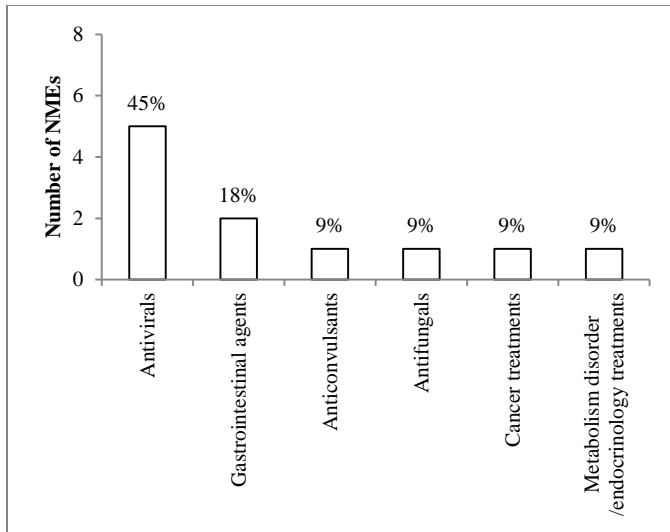

Supplemental Figure 3A. Therapeutic classes for inhibition DDIs with  $2 \leq \text{AUC ratios} < 5$ , NME as inhibitor (N = 11)

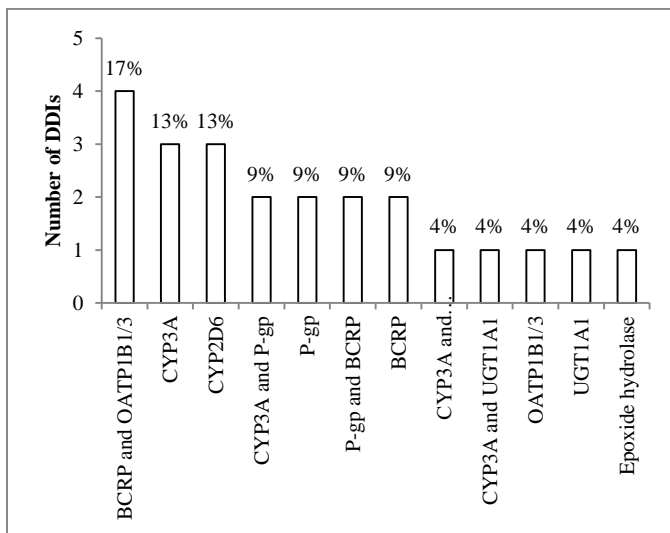

Supplemental Figure 3B. Mechanisms for inhibition DDIs with  $2 \leq \text{AUC ratios} < 5$ , NME as inhibitor (N = 23)

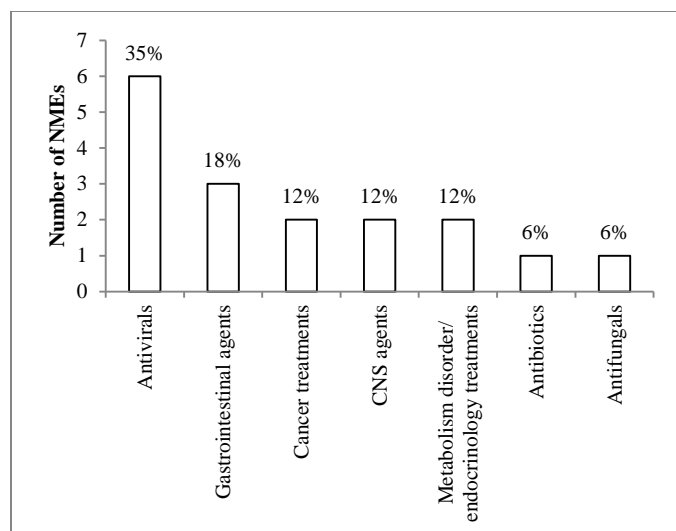

Supplemental Figure 3C. Therapeutic classes for inhibition DDIs with AUC ratios < 2, NME as inhibitor (N = 17)

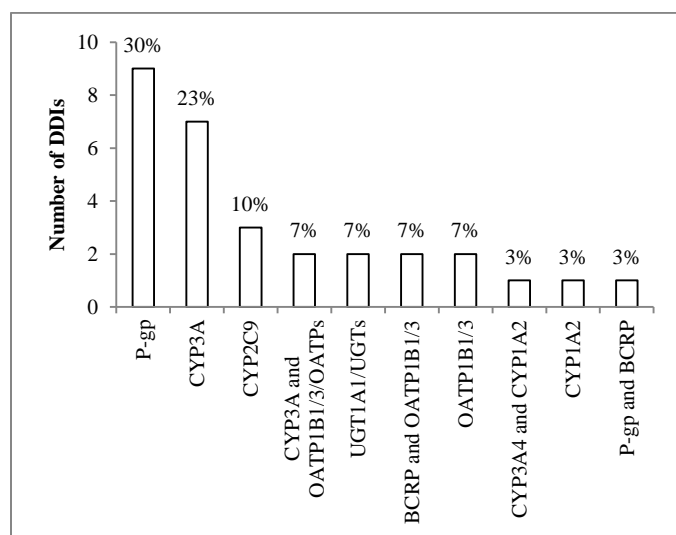

Supplemental Figure 3D. Mechanisms for inhibition DDIs with AUC ratios < 2, NME as inhibitor (N = 30)
